# Supplementary material for: Current Status of the Epidemiologic Evidence Linking Polychlorinated Biphenyls and Non-Hodgkin Lymphoma, and the Role of Immune Dysregulation
Source: PubMed Central journal article supplement (PMC3440083; doi:10.1289/ehp.1104652), 2012-05-02
Supplement: ehp.1104652.s001.pdf [file ehp.1104652.s001.pdf]

Supplemental Material

**Current Status of the Epidemiologic Evidence Linking Polychlorinated Biphenyls and Non-Hodgkin Lymphoma, and the Role of Immune Dysregulation**

Shira Kramer,<sup>1</sup> Stephanie Moller Hikel,<sup>1</sup> Kristen Adams,<sup>1</sup> David Hinds,<sup>1</sup> Katherine Moon<sup>1</sup>

<sup>1</sup> Epidemiology International, Hunt Valley, Maryland, USA

## **Supplemental Material, Table of Contents.**

|                                                                                                                             |       |
|-----------------------------------------------------------------------------------------------------------------------------|-------|
| Literature Search Key Words                                                                                                 | p. 3  |
| Summary of Inclusion/Exclusion Criteria for PCB-NHL Weight of Evidence Analysis                                             | p. 4  |
| Figure S1. Results of Literature Search for PCB-NHL Weight of Evidence Analysis.                                            | p. 5  |
| Table S1. Results from Case-Control Studies of the Association Between PCB Exposure and NHL                                 | p. 6  |
| Table S2. Characteristics of Cohort Studies Examining the Association Between Occupational PCB Exposure and NHL or Lymphoma | p. 17 |
| Table S3. Interaction Between PCBs and EBV and Risk of NHL                                                                  | p. 20 |
| References                                                                                                                  | p. 21 |

## **Supplemental Material, Literature Search Key Words.**

### ***Question 1: PCB-NHL Weight of Evidence Analysis***

Key words and indexing terms included relevant combinations of the following terms: “polychlorinated biphenyl”, “PCB”, “Aroclor”, “Arochlor”, “Clophen”, “organochlorine”, “aryl hydrocarbon”, “AhR”, “dioxin-like”, “lymphoma”, “non-Hodgkin”, “NHL”, “lymphohematopoietic”, “hematologic”, “lymphatic”, “lymphosarcoma”, “reticulosarcoma”, “carcinogen”, “cancer”, and “carcinogenicity”.

### ***Question 2: Evidence for the Role of Immune Dysregulation in Linking PCB Exposure and NHL Risk.***

Key words and indexing terms included relevant combinations of the following terms: “polychlorinated biphenyl”, “PCB”, “Aroclor”, “Arochlor”, “Clophen”, “organochlorine”, “dioxin-like”, “immune”, “inflammation”, “autoimmune”, “immunotoxic”, “immunodeficiency”, “Epstein Barr virus”, “EBV”, “antibody”, and “infection”.

## **Supplemental Material, Summary of Inclusion/Exclusion Criteria for PCB-NHL Weight of Evidence Analysis.**

The titles, abstracts, and full text (when necessary) of all citations resulting from our literature search were reviewed for potential inclusion in the weight of evidence analysis, based on the following inclusion criteria:

- 1) English language or English translation available
- 2) Humans as the primary subject (versus animal, toxicological, mechanistic, and/or methodology as the primary subject)
- 3) Presentation of original data (versus reviews, commentaries, or reports)
- 4) Specific to PCB exposure
- 5) Specific to NHL or lymphoma as an outcome
- 6) Statistical analysis of the main effect of PCB exposure on NHL/lymphoma, including data on magnitude of the effect (versus studies performing no statistical analyses or presenting only p-values)
- 7) For abstracts only: Not subsequently published in manuscript form

Figure S1 presents the numbers of citations excluded based upon each of the above-listed criteria. The relevance of each citation to the inclusion criteria was evaluated in the order of the criteria listed above, and the number of citations excluded for each criterion was counted. It was possible for a particular citation to fail to meet multiple of the inclusion criteria; however, it was only counted under the first criterion which it failed to meet.

**Supplemental Material, Figure S1.** Results of Literature Search for PCB-NHL Weight of Evidence Analysis.

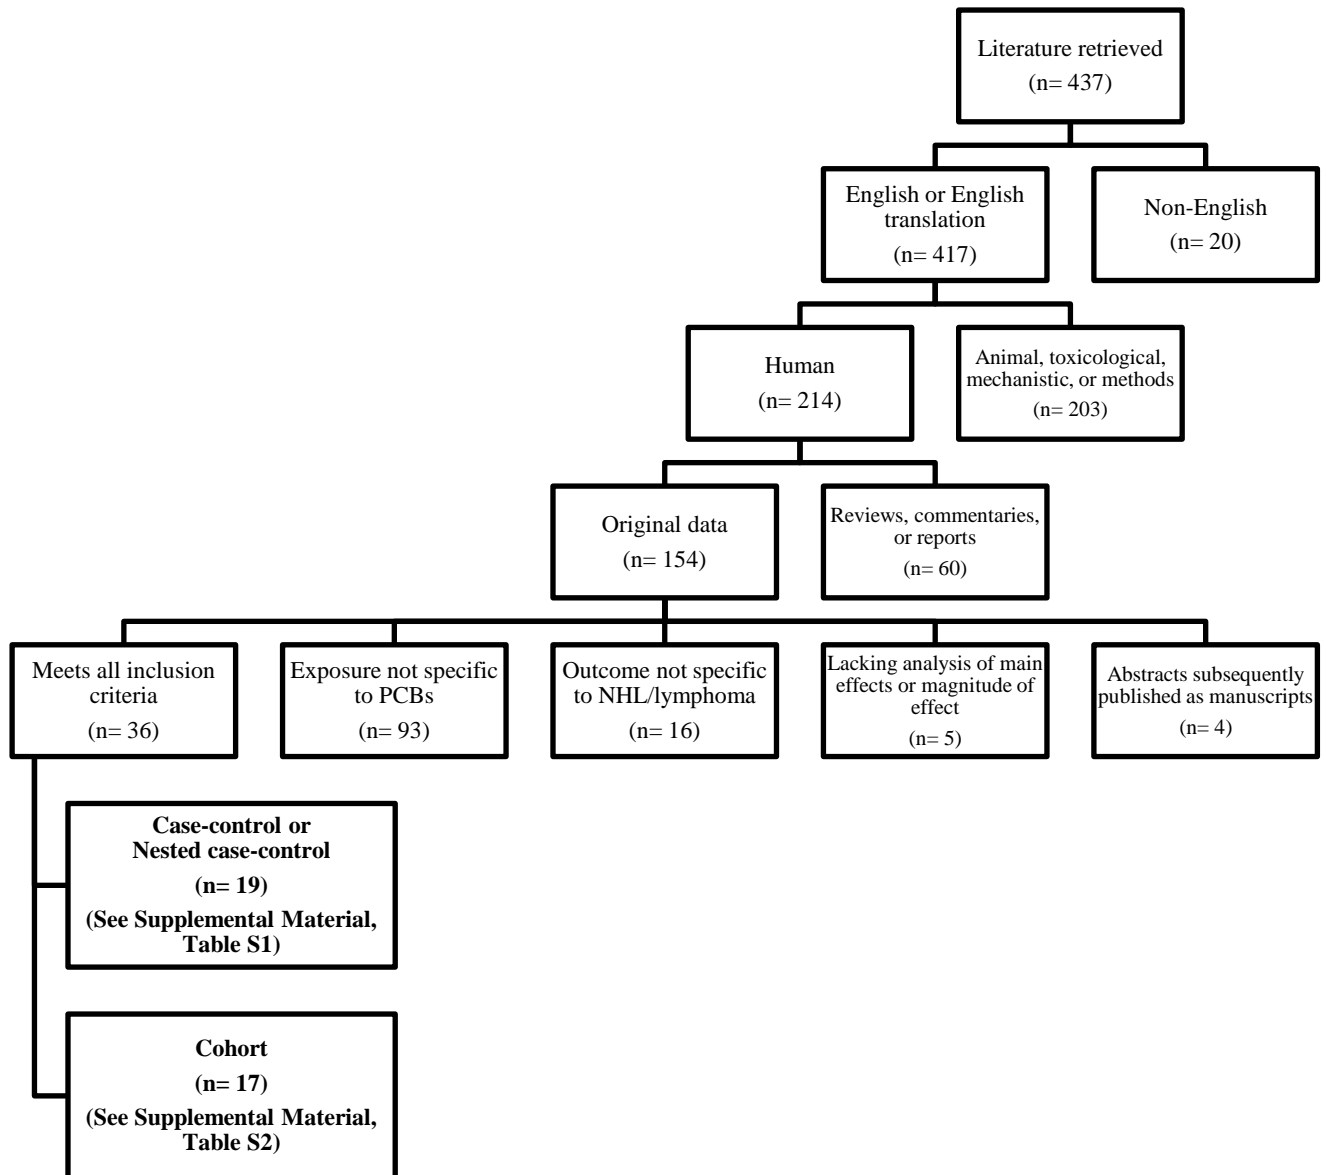

Supplemental Material, Table S1. Results from Case-Control Studies of the Association Between PCB Exposure and NHL

| Citation<br>Study Population                     | PCB source          | Control Matching<br>Variables                                         | PCB Congener or<br>Group | Exposure Level<br>(lipid adjusted) | #<br>Cases     | #<br>Controls         | OR <sup>a</sup> | 95% CI    | p-value               | Adjustment<br>Variables <sup>b</sup>                      |
|--------------------------------------------------|---------------------|-----------------------------------------------------------------------|--------------------------|------------------------------------|----------------|-----------------------|-----------------|-----------|-----------------------|-----------------------------------------------------------|
| Bertrand et al, 2010<br>Physicians' Health Study | Plasma              | Race, age, timing of<br>blood sample, fasting<br>status at blood draw | Σ PCBs                   | 163-167 ng/g lipid                 | 33             | 81                    | 1.0             | reference | <b>trend &lt;0.01</b> | Region, BMI, smoking<br>status, alcohol intake,<br>height |
|                                                  |                     |                                                                       |                          | >167-742 ng/g lipid                | 31             | 82                    | 0.86            | 0.47 1.6  |                       |                                                           |
|                                                  |                     |                                                                       |                          | >742-894 ng/g lipid                | 34             | 82                    | 0.99            | 0.55 1.8  |                       |                                                           |
|                                                  |                     |                                                                       |                          | >894-1121 ng/g lipid               | 46             | 82                    | 1.3             | 0.71 2.3  |                       |                                                           |
|                                                  |                     |                                                                       |                          | >1121-5322 ng/g lipid              | 61             | 82                    | 1.6             | 0.91 2.9  |                       |                                                           |
|                                                  |                     |                                                                       | Σ Immunotoxic PCBs       | 24-113 ng/g lipid                  | 32             | 81                    | 1.0             | reference | trend 0.09            |                                                           |
|                                                  |                     |                                                                       |                          | >113-145 ng/g lipid                | 35             | 82                    | 0.98            | 0.54 1.8  |                       |                                                           |
|                                                  |                     |                                                                       |                          | >145-189 ng/g lipid                | 36             | 82                    | 0.99            | 0.55 1.8  |                       |                                                           |
|                                                  |                     |                                                                       |                          | >189-245 ng/g lipid                | 45             | 82                    | 1.2             | 0.64 2.1  |                       |                                                           |
|                                                  |                     |                                                                       |                          | >245-1813 ng/g lipid               | 57             | 82                    | 1.4             | 0.80 2.6  |                       |                                                           |
|                                                  |                     |                                                                       | Σ PCB 118, 138, 153, 180 | 35-275 ng/g lipid                  | 31             | 81                    | 1.0             | reference | <b>trend &lt;0.01</b> |                                                           |
|                                                  |                     |                                                                       |                          | >275-344 ng/g lipid                | 32             | 82                    | 0.96            | 0.53 1.8  |                       |                                                           |
|                                                  |                     |                                                                       |                          | >344-423 ng/g lipid                | 36             | 82                    | 1.1             | 0.60 2.0  |                       |                                                           |
|                                                  |                     |                                                                       |                          | >423-525 ng/g lipid                | 38             | 82                    | 1.1             | 0.59 2.1  |                       |                                                           |
|                                                  |                     |                                                                       | PCB 118                  | >525-2440 ng/g lipid               | 68             | 82                    | 1.8             | 1.0 3.2   |                       |                                                           |
|                                                  |                     |                                                                       |                          | 4.0-42 ng/g lipid                  | 33             | 81                    | 1.0             | reference | trend 0.15            |                                                           |
|                                                  |                     |                                                                       |                          | >42-56 ng/g lipid                  | 29             | 82                    | 0.8             | 0.42 1.5  |                       |                                                           |
|                                                  |                     |                                                                       |                          | >56-77 ng/g lipid                  | 40             | 82                    | 1.1             | 0.59 2.0  |                       |                                                           |
|                                                  |                     |                                                                       |                          | >77-105 ng/g lipid                 | 46             | 82                    | 1.2             | 0.63 2.2  |                       |                                                           |
|                                                  |                     |                                                                       | >105-734 ng/g lipid      | 57                                 | 82             | 1.4                   | 0.76 2.5        |           |                       |                                                           |
|                                                  |                     |                                                                       | PCB 138                  | 4.0-59 ng/g lipid                  | 29             | 81                    | 1.0             | reference | <b>trend 0.02</b>     |                                                           |
| >59-76 ng/g lipid                                | 38                  | 82                                                                    |                          | 1.3                                | 0.68 2.3       |                       |                 |           |                       |                                                           |
| >76-97 ng/g lipid                                | 38                  | 82                                                                    |                          | 1.2                                | 0.64 2.1       |                       |                 |           |                       |                                                           |
| >97-122 ng/g lipid                               | 37                  | 82                                                                    |                          | 1.2                                | 0.64 2.2       |                       |                 |           |                       |                                                           |
| PCB 153                                          | >122-541 ng/g lipid | 63                                                                    | 82                       | 1.8                                | 0.98 3.2       |                       |                 |           |                       |                                                           |
|                                                  | 6.1-95 ng/g lipid   | 28                                                                    | 81                       | 1.0                                | reference      | <b>trend &lt;0.01</b> |                 |           |                       |                                                           |
|                                                  | >95-122 ng/g lipid  | 37                                                                    | 82                       | 1.2                                | 0.67 2.3       |                       |                 |           |                       |                                                           |
|                                                  | >122-148 ng/g lipid | 36                                                                    | 82                       | 1.3                                | 0.68 2.4       |                       |                 |           |                       |                                                           |
| >148-188 ng/g lipid                              | 37                  | 82                                                                    | 1.2                      | 0.62 2.2                           |                |                       |                 |           |                       |                                                           |
| PCB 180                                          | >188-761 ng/g lipid | 67                                                                    | 82                       | <b>2.1</b>                         | <b>1.1 3.8</b> |                       |                 |           |                       |                                                           |
|                                                  | 21-68 ng/g lipid    | 25                                                                    | 81                       | 1.0                                | reference      | <b>trend &lt;0.01</b> |                 |           |                       |                                                           |
|                                                  | >68-84 ng/g lipid   | 40                                                                    | 82                       | 1.5                                | 0.82 2.7       |                       |                 |           |                       |                                                           |
|                                                  | >84-102 ng/g lipid  | 35                                                                    | 82                       | 1.4                                | 0.75 2.7       |                       |                 |           |                       |                                                           |
|                                                  | >102-126 ng/g lipid | 44                                                                    | 82                       | 1.8                                | 0.96 3.3       |                       |                 |           |                       |                                                           |
| >126-528 ng/g lipid                              | 61                  | 82                                                                    | <b>2.4</b>               | <b>1.3 4.5</b>                     |                |                       |                 |           |                       |                                                           |

Supplemental Material, Table S1 (continued).

| Citation<br>Study Population                                                                              | PCB source        | Control Matching<br>Variables                                                                      | PCB Congener or<br>Group                    | Exposure Level<br>(lipid adjusted) | #<br>Cases | #<br>Controls | OR <sup>a</sup> | 95% CI    | p-value    | Adjustment<br>Variables <sup>b</sup>    |
|-----------------------------------------------------------------------------------------------------------|-------------------|----------------------------------------------------------------------------------------------------|---------------------------------------------|------------------------------------|------------|---------------|-----------------|-----------|------------|-----------------------------------------|
| Cocco et al, 2008<br>Participants in Epilymph<br>case-control study from<br>France, Germany, and<br>Spain | Plasma            | None.<br>Plasma samples for<br>controls randomly<br>sampled from<br>Epilymph study<br>participants | Σ PCBs                                      | ≤200.42 ppb                        | 41         | 51            | 1.0             | reference | trend 0.83 | Age, gender, education,<br>study center |
|                                                                                                           |                   |                                                                                                    |                                             | 200.43-387.79 ppb                  | 50         | 51            | 1.2             | 0.6 2.2   |            |                                         |
|                                                                                                           |                   |                                                                                                    |                                             | 387.80-576.36 ppb                  | 33         | 50            | 0.7             | 0.3 1.4   |            |                                         |
|                                                                                                           |                   |                                                                                                    |                                             | ≥576.37 ppb                        | 50         | 51            | 1.0             | 0.5 2.0   |            |                                         |
|                                                                                                           |                   |                                                                                                    | Σ Immunotoxic PCBs                          | ≤153.46 ppb                        | 38         | 51            | 1.0             | reference | trend 0.76 |                                         |
|                                                                                                           |                   |                                                                                                    |                                             | 153.47-215.38 ppb                  | 37         | 50            | 1.0             | 0.5 1.8   |            |                                         |
|                                                                                                           |                   |                                                                                                    |                                             | 215.39-334.14 ppb                  | 48         | 51            | 1.1             | 0.6 2.1   |            |                                         |
|                                                                                                           |                   |                                                                                                    |                                             | ≥334.15 ppb                        | 51         | 51            | 1.1             | 0.6 2.1   |            |                                         |
|                                                                                                           |                   |                                                                                                    | Σ BRCA1 inhibitors                          | ≤135.46 ppb                        | 41         | 51            | 1.0             | reference | trend 0.77 |                                         |
|                                                                                                           |                   |                                                                                                    |                                             | 135.47-215.38 ppb                  | 31         | 50            | 0.8             | 0.4 1.5   |            |                                         |
|                                                                                                           |                   |                                                                                                    |                                             | 215.39-334.14 ppb                  | 55         | 51            | 1.3             | 0.7 2.5   |            |                                         |
|                                                                                                           |                   |                                                                                                    |                                             | ≥334.15 ppb                        | 47         | 51            | 1.0             | 0.5 1.9   |            |                                         |
|                                                                                                           |                   |                                                                                                    | Σ Pseudo-estrogen PCBs                      | ≤83.81 ppb                         | 39         | 51            | 1.0             | reference | trend 0.63 |                                         |
|                                                                                                           |                   |                                                                                                    |                                             | 83.82-166.75 ppb                   | 44         | 50            | 1.1             | 0.6 2.1   |            |                                         |
|                                                                                                           |                   |                                                                                                    |                                             | 166.76-290.85 ppb                  | 40         | 51            | 0.9             | 0.4 1.8   |            |                                         |
|                                                                                                           |                   |                                                                                                    |                                             | ≥290.86 ppb                        | 51         | 51            | 1.2             | 0.6 2.5   |            |                                         |
|                                                                                                           |                   |                                                                                                    | Σ High chlorinated anti-<br>estrogenic PCBs | ≤0.30 ppb                          | 20         | 22            | 1.0             | reference | trend 0.96 |                                         |
|                                                                                                           |                   |                                                                                                    |                                             | 0.31-65.63 ppb                     | 42         | 60            | 0.9             | 0.4 1.9   |            |                                         |
|                                                                                                           |                   |                                                                                                    |                                             | 65.64-113.43 ppb                   | 49         | 59            | 0.9             | 0.4 2.2   |            |                                         |
|                                                                                                           |                   |                                                                                                    |                                             | ≥113.44 ppb                        | 63         | 62            | 1.0             | 0.4 2.2   |            |                                         |
| Σ Phenobarbitol-inducer<br>PCBs                                                                           | ≤99.540 ppb       | 39                                                                                                 | 60                                          | 1.0                                | reference  | trend 0.59    |                 |           |            |                                         |
|                                                                                                           | 99.55-161.85 ppb  | 46                                                                                                 | 47                                          | 1.5                                | 0.8 2.7    |               |                 |           |            |                                         |
|                                                                                                           | 161.86-237.29 ppb | 35                                                                                                 | 48                                          | 1.0                                | 0.5 2.0    |               |                 |           |            |                                         |
|                                                                                                           | ≥237.30 ppb       | 54                                                                                                 | 48                                          | 1.3                                | 0.7 2.5    |               |                 |           |            |                                         |
| Σ Phenobarbitol and 3-<br>methyl cholanthrene<br>mixed inducer PCBs                                       | ≤57.95 ppb        | 40                                                                                                 | 54                                          | 1.0                                | reference  | trend 0.74    |                 |           |            |                                         |
|                                                                                                           | 57.96-106.03 ppb  | 41                                                                                                 | 48                                          | 1.4                                | 0.7 2.7    |               |                 |           |            |                                         |
|                                                                                                           | 106.04-192.91 ppb | 56                                                                                                 | 50                                          | 1.5                                | 0.8 2.8    |               |                 |           |            |                                         |
|                                                                                                           | ≥192.92 ppb       | 37                                                                                                 | 51                                          | 0.9                                | 0.5 1.8    |               |                 |           |            |                                         |
| PCB 28                                                                                                    | ≤10.50 ppb        | 83                                                                                                 | 99                                          | 1.0                                | reference  | trend 0.23    |                 |           |            |                                         |
|                                                                                                           | 10.51-31.70 ppb   | 25                                                                                                 | 34                                          | 0.9                                | 0.4 1.8    |               |                 |           |            |                                         |
|                                                                                                           | 31.71-67.94 ppb   | 21                                                                                                 | 34                                          | 0.7                                | 0.3 1.5    |               |                 |           |            |                                         |
|                                                                                                           | ≥67.95 ppb        | 45                                                                                                 | 36                                          | 1.6                                | 0.8 3.2    |               |                 |           |            |                                         |
| PCB 118                                                                                                   | ≤12.30 ppb        | 94                                                                                                 | 100                                         | 1.0                                | reference  | trend 0.004   |                 |           |            |                                         |
|                                                                                                           | 12.31-38.76 ppb   | 41                                                                                                 | 34                                          | 1.0                                | 0.5 2.0    |               |                 |           |            |                                         |
|                                                                                                           | 38.77-59.17 ppb   | 20                                                                                                 | 34                                          | 0.5                                | 0.2 1.0    |               |                 |           |            |                                         |
|                                                                                                           | ≥59.18 ppb        | 19                                                                                                 | 35                                          | 0.4                                | 0.2 0.8    |               |                 |           |            |                                         |
| PCB 138                                                                                                   | ≤45.73 ppb        | 51                                                                                                 | 66                                          | 1.0                                | reference  | trend 0.88    |                 |           |            |                                         |
|                                                                                                           | 45.74-72.41 ppb   | 37                                                                                                 | 46                                          | 1.1                                | 0.6 1.9    |               |                 |           |            |                                         |
|                                                                                                           | 72.42-116.12 ppb  | 42                                                                                                 | 45                                          | 1.1                                | 0.6 2.0    |               |                 |           |            |                                         |
|                                                                                                           | ≥116.13 ppb       | 44                                                                                                 | 46                                          | 1.1                                | 0.6 2.0    |               |                 |           |            |                                         |
| PCB 153                                                                                                   | ≤62.56 ppb        | 43                                                                                                 | 65                                          | 1.0                                | reference  | trend 0.70    |                 |           |            |                                         |
|                                                                                                           | 62.57-100.66 ppb  | 51                                                                                                 | 46                                          | 1.5                                | 0.8 2.8    |               |                 |           |            |                                         |
|                                                                                                           | 100.67-142.43 ppb | 28                                                                                                 | 46                                          | 0.8                                | 0.4 1.6    |               |                 |           |            |                                         |
|                                                                                                           | ≥142.44 ppb       | 52                                                                                                 | 46                                          | 1.3                                | 0.7 2.5    |               |                 |           |            |                                         |
| PCB 170                                                                                                   | ≤0.20 ppb         | 53                                                                                                 | 65                                          | 1.0                                | reference  | trend 0.83    |                 |           |            |                                         |
|                                                                                                           | 0.21-21.53 ppb    | 40                                                                                                 | 46                                          | 1.1                                | 0.5 2.2    |               |                 |           |            |                                         |
|                                                                                                           | 21.54-34.28 ppb   | 36                                                                                                 | 45                                          | 0.8                                | 0.4 1.7    |               |                 |           |            |                                         |
|                                                                                                           | ≥34.29 ppb        | 45                                                                                                 | 47                                          | 1.0                                | 0.5 1.8    |               |                 |           |            |                                         |
| PCB 180                                                                                                   | ≤0.30 ppb         | 23                                                                                                 | 32                                          | 1.0                                | reference  | trend 0.31    |                 |           |            |                                         |
|                                                                                                           | 0.31-51.22 ppb    | 40                                                                                                 | 57                                          | 1.2                                | 0.6 2.6    |               |                 |           |            |                                         |
|                                                                                                           | 51.23-85.93 ppb   | 50                                                                                                 | 56                                          | 1.4                                | 0.6 3.0    |               |                 |           |            |                                         |
|                                                                                                           | ≥85.94 ppb        | 61                                                                                                 | 58                                          | 1.5                                | 0.7 3.2    |               |                 |           |            |                                         |

Supplemental Material, Table S1 (continued).

| Citation<br>Study Population       | PCB source       | Control Matching<br>Variables                           | PCB Congener or<br>Group                  | Exposure Level<br>(lipid adjusted)        | #<br>Cases | #<br>Controls | OR <sup>a</sup> | 95% CI     | p-value    | Adjustment<br>Variables <sup>b</sup>       |
|------------------------------------|------------------|---------------------------------------------------------|-------------------------------------------|-------------------------------------------|------------|---------------|-----------------|------------|------------|--------------------------------------------|
| Colt et al, 2005<br>NCI-SEER study | Carpet dust      | Frequency matched on<br>age, sex, race, study<br>center | Σ PCBs                                    | all below UDL                             | 315        | 262           | 1.0             | reference  | trend 0.14 | Study center, sex, age,<br>education       |
|                                    |                  |                                                         |                                           | any above UDL                             | 288        | 181           | 1.5             | 1.2 2.0    |            |                                            |
|                                    |                  |                                                         |                                           | 21.9-82.5 ng/g                            | 88         | 57            | 1.4             | 0.9 2.1    |            |                                            |
|                                    |                  |                                                         |                                           | 82.5-202.8 ng/g                           | 114        | 63            | 1.6             | 1.1 2.4    |            |                                            |
|                                    |                  |                                                         |                                           | 203.8-23,380 ng/g                         | 92         | 61            | 1.5             | 1.0 2.2    |            |                                            |
|                                    |                  |                                                         | PCB 105                                   | below UDL                                 | 486        | 368           | 1.0             | reference  | trend 0.74 |                                            |
|                                    |                  |                                                         |                                           | above UDL                                 | 117        | 75            | 1.2             | 0.9 1.7    |            |                                            |
|                                    |                  |                                                         |                                           | 20.8-31.0 ng/g                            | 40         | 24            | 1.3             | 0.8 2.2    |            |                                            |
|                                    |                  |                                                         | PCB 138                                   | 31.3-73.0 ng/g                            | 43         | 26            | 1.4             | 0.8 2.4    | trend 0.95 |                                            |
|                                    |                  |                                                         |                                           | 75.8-3,860 ng/g                           | 34         | 25            | 1.1             | 0.6 1.9    |            |                                            |
|                                    |                  |                                                         |                                           | below UDL                                 | 398        | 305           | 1.0             | reference  |            |                                            |
|                                    |                  |                                                         |                                           | above UDL                                 | 205        | 138           | 1.3             | 1.0 1.7    |            |                                            |
| PCB 153                            | 20.8-33.6 ng/g   | 64                                                      | 46                                        | 1.2                                       | 0.8 1.8    | trend 0.34    |                 |            |            |                                            |
|                                    | 33.7-84.2 ng/g   | 83                                                      | 46                                        | 1.6                                       | 1.1 2.4    |               |                 |            |            |                                            |
|                                    | 84.9-10,200 ng/g | 58                                                      | 46                                        | 1.1                                       | 0.7 1.7    |               |                 |            |            |                                            |
|                                    | below UDL        | 351                                                     | 280                                       | 1.0                                       | reference  |               |                 |            |            |                                            |
| PCB 170                            | above UDL        | 252                                                     | 163                                       | 1.4                                       | 1.1 1.8    | trend 0.17    |                 |            |            |                                            |
|                                    | 20.8-32.9 ng/g   | 74                                                      | 54                                        | 1.2                                       | 0.8 1.7    |               |                 |            |            |                                            |
|                                    | 33.1-74.2 ng/g   | 101                                                     | 55                                        | 1.7                                       | 1.2 2.5    |               |                 |            |            |                                            |
|                                    | 74.5-6,460 ng/g  | 77                                                      | 54                                        | 1.3                                       | 0.9 2.0    |               |                 |            |            |                                            |
| PCB 180                            | below UDL        | 509                                                     | 389                                       | 1.0                                       | reference  | trend 0.03    |                 |            |            |                                            |
|                                    | above UDL        | 94                                                      | 54                                        | 1.5                                       | 1.0 2.1    |               |                 |            |            |                                            |
|                                    | 20.8-28.3 ng/g   | 30                                                      | 18                                        | 1.4                                       | 0.8 2.6    |               |                 |            |            |                                            |
|                                    | 28.6-52.9 ng/g   | 31                                                      | 18                                        | 1.5                                       | 0.8 2.7    |               |                 |            |            |                                            |
| PCB 180                            | 53.7-1,380 ng/g  | 33                                                      | 18                                        | 1.5                                       | 0.8 2.7    | trend 0.03    |                 |            |            |                                            |
|                                    | below UDL        | 432                                                     | 338                                       | 1.0                                       | reference  |               |                 |            |            |                                            |
|                                    | above UDL        | 171                                                     | 105                                       | 1.5                                       | 1.1 2.0    |               |                 |            |            |                                            |
|                                    | 20.8-31.6 ng/g   | 52                                                      | 35                                        | 1.3                                       | 0.8 2.1    |               |                 |            |            |                                            |
| Colt et al, 2009<br>NCI-SEER study | Carpet dust      | Frequency matched on<br>age, sex, race, study<br>center | PCB 180                                   | per 10% increase in exposure (ng/g)       | 682        | 513           | RR= 0.7%        | 0.0% 1.3%  | p=0.041    | Age, sex, race,<br>education, study center |
|                                    | Plasma           |                                                         | PCB 180                                   | per 10% increase in exposure (pg/g lipid) | 100        | 100           | RR= 8.3%        | 1.9% 14.6% | p=0.009    |                                            |
|                                    | Σ TEQ            |                                                         | per 10% increase in exposure (pg/g lipid) | 96                                        | 95         | RR= 7.8%      | 1.1% 17.2%      | p=0.022    |            |                                            |



Supplemental Material, Table S1 (continued).

| Citation<br>Study Population          | PCB source               | Control Matching<br>Variables               | PCB Congener or<br>Group         | Exposure Level<br>(lipid adjusted) | #<br>Cases | #<br>Controls | OR <sup>a</sup> | 95% CI      | p-value    | Adjustment<br>Variables <sup>b</sup>        |
|---------------------------------------|--------------------------|---------------------------------------------|----------------------------------|------------------------------------|------------|---------------|-----------------|-------------|------------|---------------------------------------------|
| De Roos et al, 2005<br>NCI-SEER study | Plasma                   | Age, date of blood<br>draw, sex, study site | Σ Noncoplanar PCBs               | ≤0.445 mol/g lipid                 | 19         | 22            | 1.0             | reference   | trend 0.24 | Age, sex, study site,<br>date of blood draw |
|                                       |                          |                                             |                                  | >0.445-0.667 mol/g lipid           | 21         | 25            | 1.30            | 0.51 3.35   |            |                                             |
|                                       |                          |                                             |                                  | >0.667-0.900 mol/g lipid           | 25         | 24            | 1.66            | 0.61 4.53   |            |                                             |
|                                       |                          |                                             |                                  | >0.900 mol/g lipid                 | 27         | 23            | 1.85            | 0.67 5.14   |            |                                             |
|                                       |                          |                                             |                                  | per 0.01 mol/g lipid               | --         | --            | 1.003           | 0.996 1.010 |            |                                             |
|                                       |                          |                                             | Σ Low chlorinated PCBs           | ≤0.027 mol/g lipid                 | 25         | 26            | 1.0             | reference   | trend 0.66 |                                             |
|                                       |                          |                                             |                                  | >0.027-0.046 mol/g lipid           | 28         | 25            | 1.12            | 0.51 2.45   |            |                                             |
|                                       |                          |                                             |                                  | >0.046-0.066 mol/g lipid           | 16         | 24            | 0.73            | 0.30 1.75   |            |                                             |
|                                       |                          |                                             |                                  | >0.066 mol/g lipid                 | 31         | 25            | 1.26            | 0.52 3.03   |            |                                             |
|                                       |                          |                                             | per 0.01 mol/g lipid             | --                                 | --         | 1.05          | 0.95 1.15       |             |            |                                             |
|                                       |                          |                                             | Σ Moderately chlorinated<br>PCBs | ≤0.385 mol/g lipid                 | 19         | 23            | 1.0             | reference   | trend 0.29 |                                             |
|                                       |                          |                                             |                                  | >0.385-0.599 mol/g lipid           | 25         | 23            | 1.52            | 0.58 4.01   |            |                                             |
|                                       |                          |                                             |                                  | >0.599-0.785 mol/g lipid           | 20         | 24            | 1.43            | 0.49 4.11   |            |                                             |
| >0.785 mol/g lipid                    | 29                       | 24                                          |                                  | 1.88                               | 0.67 5.26  |               |                 |             |            |                                             |
| per 0.01 mol/g lipid                  | --                       | --                                          | 1.003                            | 0.996 1.011                        |            |               |                 |             |            |                                             |
| Σ High chlorinated PCBs               | ≤0.018 mol/g lipid       | 17                                          | 25                               | 1.0                                | reference  | trend 0.04    |                 |             |            |                                             |
|                                       | >0.018-0.026 mol/g lipid | 24                                          | 25                               | 1.59                               | 0.62 4.04  |               |                 |             |            |                                             |
|                                       | >0.026-0.036 mol/g lipid | 20                                          | 25                               | 1.35                               | 0.53 3.48  |               |                 |             |            |                                             |
|                                       | >0.036 mol/g lipid       | 37                                          | 25                               | 2.68                               | 1.04 6.90  |               |                 |             |            |                                             |
| per 0.01 mol/g lipid                  | --                       | --                                          | 1.17                             | 0.99 1.39                          |            |               |                 |             |            |                                             |
| Σ PCB TEQ                             | ≤6.40 pg/g lipid         | 28                                          | 24                               | 1.0                                | reference  | trend 0.15    |                 |             |            |                                             |
|                                       | >6.40-8.69 pg/g lipid    | 16                                          | 25                               | 0.59                               | 0.25 1.40  |               |                 |             |            |                                             |
|                                       | >8.69-13.17 pg/g lipid   | 20                                          | 23                               | 0.86                               | 0.38 1.98  |               |                 |             |            |                                             |
|                                       | >13.17 pg/g lipid        | 33                                          | 24                               | 1.51                               | 0.62 3.67  |               |                 |             |            |                                             |
|                                       | per 10 pg/g lipid        | --                                          | --                               | 1.34                               | 0.85 2.12  |               |                 |             |            |                                             |
| PCB 74                                | ≤7.8 ng/g lipid          | 25                                          | 26                               | 1.0                                | reference  | trend 0.66    |                 |             |            |                                             |
|                                       | >7.8-13.3 ng/g lipid     | 28                                          | 25                               | 1.12                               | 0.51 2.45  |               |                 |             |            |                                             |
|                                       | >13.3-19.3 ng/g lipid    | 16                                          | 24                               | 0.73                               | 0.30 1.75  |               |                 |             |            |                                             |
|                                       | >19.3 ng/g lipid         | 31                                          | 25                               | 1.26                               | 0.52 3.03  |               |                 |             |            |                                             |
| per 10 ng/g lipid                     | --                       | --                                          | 1.16                             | 0.85 1.59                          |            |               |                 |             |            |                                             |
| PCB 99                                | ≤5.6 ng/g lipid          | 24                                          | 25                               | 1.0                                | reference  | trend 1.00    |                 |             |            |                                             |
|                                       | >5.6-9.3 ng/g lipid      | 22                                          | 25                               | 0.63                               | 0.24 1.68  |               |                 |             |            |                                             |
|                                       | >9.3-16.1 ng/g lipid     | 30                                          | 25                               | 1.04                               | 0.45 2.39  |               |                 |             |            |                                             |
|                                       | >16.1 ng/g lipid         | 24                                          | 25                               | 0.77                               | 0.28 2.10  |               |                 |             |            |                                             |
| per 10 ng/g lipid                     | --                       | --                                          | 0.94                             | 0.76 1.17                          |            |               |                 |             |            |                                             |
| PCB 118                               | ≤8.1 ng/g lipid          | 29                                          | 24                               | 1.0                                | reference  | trend 0.88    |                 |             |            |                                             |
|                                       | >8.1-11.8 ng/g lipid     | 14                                          | 25                               | 0.36                               | 0.13 0.98  |               |                 |             |            |                                             |
|                                       | >11.8-25.8 ng/g lipid    | 30                                          | 24                               | 0.91                               | 0.42 1.98  |               |                 |             |            |                                             |
|                                       | >25.8 ng/g lipid         | 24                                          | 24                               | 0.73                               | 0.29 1.84  |               |                 |             |            |                                             |
| per 10 ng/g lipid                     | --                       | --                                          | 0.98                             | 0.82 1.18                          |            |               |                 |             |            |                                             |
| PCB 126                               | ≤18.9 pg/g lipid         | 29                                          | 25                               | 1.0                                | reference  | trend 0.54    |                 |             |            |                                             |
|                                       | >18.9-30.3 pg/g lipid    | 20                                          | 25                               | 0.65                               | 0.29 1.49  |               |                 |             |            |                                             |
|                                       | >30.3-52.7 pg/g lipid    | 21                                          | 25                               | 0.73                               | 0.31 1.72  |               |                 |             |            |                                             |
|                                       | >52.7 pg/g lipid         | 30                                          | 24                               | 1.09                               | 0.49 2.41  |               |                 |             |            |                                             |
| per 10 pg/g lipid                     | --                       | --                                          | 1.02                             | 0.95 1.10                          |            |               |                 |             |            |                                             |
| PCB 156                               | ≤5.5 ng/g lipid          | 17                                          | 22                               | 1.0                                | reference  | trend 0.03    |                 |             |            |                                             |
|                                       | >5.5-7.8 ng/g lipid      | 27                                          | 30                               | 1.70                               | 0.48 6.03  |               |                 |             |            |                                             |
|                                       | >7.8-9.8 ng/g lipid      | 16                                          | 26                               | 1.02                               | 0.32 3.26  |               |                 |             |            |                                             |
|                                       | >9.8 ng/g lipid          | 40                                          | 22                               | 2.70                               | 0.97 7.50  |               |                 |             |            |                                             |
| per 10 ng/g lipid                     | --                       | --                                          | 1.69                             | 0.91 3.11                          |            |               |                 |             |            |                                             |

Supplemental Material, Table S1 (continued).

| Citation<br>Study Population       | PCB source            | Control Matching<br>Variables | PCB Congener or<br>Group | Exposure Level<br>(lipid adjusted) | #<br>Cases       | #<br>Controls     | OR <sup>a</sup> | 95% CI           | p-value           | Adjustment<br>Variables <sup>b</sup>        |
|------------------------------------|-----------------------|-------------------------------|--------------------------|------------------------------------|------------------|-------------------|-----------------|------------------|-------------------|---------------------------------------------|
| De Roos et al, 2005<br>(continued) |                       |                               | PCB 169                  | ≤18.5 pg/g lipid                   | 22               | 26                | 1.0             | reference        | trend 0.11        | Age, sex, study site,<br>date of blood draw |
|                                    |                       |                               |                          | >18.5-28.4 pg/g lipid              | 23               | 24                | 1.14            | 0.49 2.66        |                   |                                             |
|                                    |                       |                               |                          | >28.4-37.7 pg/g lipid              | 20               | 25                | 1.08            | 0.41 2.82        |                   |                                             |
|                                    |                       |                               |                          | >37.7 pg/g lipid                   | 35               | 24                | 2.62            | 0.88 7.80        |                   |                                             |
|                                    |                       |                               |                          | per 10 pg/g lipid                  | --               | --                | <b>1.47</b>     | <b>1.13 1.91</b> |                   |                                             |
|                                    |                       |                               | PCB 138-158              | ≤25.2 ng/g lipid                   | 26               | 25                | 1.0             | reference        | trend 0.53        |                                             |
|                                    |                       |                               |                          | >25.2-38.3 ng/g lipid              | 20               | 25                | 0.82            | 0.38 1.78        |                   |                                             |
|                                    |                       |                               |                          | >38.3-55.5 ng/g lipid              | 25               | 25                | 1.04            | 0.47 2.33        |                   |                                             |
|                                    |                       |                               |                          | >55.5 ng/g lipid                   | 29               | 25                | 1.22            | 0.49 3.05        |                   |                                             |
|                                    |                       |                               |                          | per 10 ng/g lipid                  | --               | --                | <b>1.02</b>     | <b>0.93 1.12</b> |                   |                                             |
|                                    |                       |                               | PCB 146                  | ≤4.4 ng/g lipid                    | 20               | 28                | 1.0             | reference        | trend 0.17        |                                             |
|                                    |                       |                               |                          | >4.4-6.0 ng/g lipid                | 24               | 23                | 1.06            | 0.36 3.08        |                   |                                             |
|                                    |                       |                               |                          | >6.0-8.7 ng/g lipid                | 24               | 24                | 1.37            | 0.50 3.79        |                   |                                             |
|                                    |                       |                               |                          | >8.7 ng/g lipid                    | 32               | 25                | 1.81            | 0.70 4.64        |                   |                                             |
|                                    |                       |                               |                          | per 10 ng/g lipid                  | --               | --                | <b>1.54</b>     | <b>0.81 2.95</b> |                   |                                             |
|                                    |                       |                               | PCB 153                  | ≤37 ng/g lipid                     | 23               | 25                | 1.0             | reference        | trend 0.40        |                                             |
|                                    |                       |                               |                          | >37-56.2 ng/g lipid                | 27               | 25                | 1.36            | 0.57 3.25        |                   |                                             |
|                                    |                       |                               |                          | >56.2-71.3 ng/g lipid              | 16               | 25                | 0.80            | 0.32 2.03        |                   |                                             |
|                                    |                       |                               |                          | >71.3 ng/g lipid                   | 34               | 25                | 1.59            | 0.63 4.00        |                   |                                             |
|                                    |                       |                               |                          | per 10 ng/g lipid                  | --               | --                | <b>1.03</b>     | <b>0.96 1.12</b> |                   |                                             |
|                                    |                       |                               | PCB 170                  | ≤12.2 ng/g lipid                   | 22               | 25                | 1.0             | reference        | trend 0.13        |                                             |
|                                    |                       |                               |                          | >12.2-17 ng/g lipid                | 16               | 24                | 0.84            | 0.36 1.92        |                   |                                             |
|                                    |                       |                               |                          | >17-22.5 ng/g lipid                | 27               | 24                | 1.59            | 0.63 4.02        |                   |                                             |
|                                    |                       |                               |                          | >22.5 ng/g lipid                   | 31               | 24                | 1.73            | 0.73 4.14        |                   |                                             |
|                                    |                       |                               |                          | per 10 ng/g lipid                  | --               | --                | <b>1.24</b>     | <b>0.94 1.63</b> |                   |                                             |
|                                    |                       |                               | PCB 180                  | ≤28.7 ng/g lipid                   | 16               | 26                | 1.0             | reference        | <b>trend 0.01</b> |                                             |
|                                    |                       |                               |                          | >28.7-41.2 ng/g lipid              | 21               | 24                | 1.72            | 0.65 4.54        |                   |                                             |
|                                    |                       |                               |                          | >41.2-54.4 ng/g lipid              | 22               | 25                | 1.82            | 0.70 4.76        |                   |                                             |
| >54.4 ng/g lipid                   | 41                    | 25                            |                          | <b>3.50</b>                        | <b>1.34 9.15</b> |                   |                 |                  |                   |                                             |
| per 10 ng/g lipid                  | --                    | --                            |                          | <b>1.08</b>                        | <b>0.98 1.20</b> |                   |                 |                  |                   |                                             |
| PCB 183                            | ≤2.7 ng/g lipid       | 30                            | 25                       | 1.0                                | reference        | trend 0.96        |                 |                  |                   |                                             |
|                                    | >2.7-4.4 ng/g lipid   | 21                            | 20                       | 0.93                               | 0.16 5.46        |                   |                 |                  |                   |                                             |
|                                    | >4.4-6.3 ng/g lipid   | 22                            | 27                       | 0.73                               | 0.26 2.06        |                   |                 |                  |                   |                                             |
|                                    | >6.3 ng/g lipid       | 27                            | 28                       | 1.02                               | 0.36 2.93        |                   |                 |                  |                   |                                             |
|                                    | per 10 ng/g lipid     | --                            | --                       | <b>0.91</b>                        | <b>0.42 1.97</b> |                   |                 |                  |                   |                                             |
| PCB 187                            | ≤8.8 ng/g lipid       | 24                            | 25                       | 1.0                                | reference        | trend 0.18        |                 |                  |                   |                                             |
|                                    | >8.8-12.0 ng/g lipid  | 13                            | 25                       | 0.59                               | 0.22 1.57        |                   |                 |                  |                   |                                             |
|                                    | >12.0-18.0 ng/g lipid | 33                            | 25                       | 1.34                               | 0.59 3.04        |                   |                 |                  |                   |                                             |
|                                    | >18.0 ng/g lipid      | 30                            | 25                       | 1.22                               | 0.49 3.08        |                   |                 |                  |                   |                                             |
|                                    | per 10 ng/g lipid     | --                            | --                       | <b>1.09</b>                        | <b>0.84 1.42</b> |                   |                 |                  |                   |                                             |
| PCB 194                            | ≤7.9 ng/g lipid       | 17                            | 25                       | 1.0                                | reference        | <b>trend 0.04</b> |                 |                  |                   |                                             |
|                                    | >7.9-11.2 ng/g lipid  | 24                            | 25                       | 1.59                               | 0.62 4.04        |                   |                 |                  |                   |                                             |
|                                    | >11.2-15.6 ng/g lipid | 20                            | 25                       | 1.35                               | 0.53 3.48        |                   |                 |                  |                   |                                             |
|                                    | >15.6 ng/g lipid      | 37                            | 25                       | <b>2.68</b>                        | <b>1.04 6.90</b> |                   |                 |                  |                   |                                             |
|                                    | per 10 ng/g lipid     | --                            | --                       | <b>1.45</b>                        | <b>0.98 2.15</b> |                   |                 |                  |                   |                                             |

Supplemental Material, Table S1 (continued).

| Citation<br>Study Population                                            | PCB source                                                        | Control Matching<br>Variables                                                                                                                                                         | PCB Congener or<br>Group       | Exposure Level<br>(lipid adjusted) | #<br>Cases      | #<br>Controls | OR <sup>a</sup>                                                                            | 95% CI          | p-value      | Adjustment<br>Variables <sup>b</sup>                                                       |
|-------------------------------------------------------------------------|-------------------------------------------------------------------|---------------------------------------------------------------------------------------------------------------------------------------------------------------------------------------|--------------------------------|------------------------------------|-----------------|---------------|--------------------------------------------------------------------------------------------|-----------------|--------------|--------------------------------------------------------------------------------------------|
| Engel et al, 2007<br>Janus,<br>CLUE I,<br>Nurses' Health Study<br>(NHS) | Janus cohort: Serum<br>CLUE I cohort: Serum<br>NHS cohort: Plasma | Janus cohort:<br>Sex, county, age at<br>examination, date of<br>examination<br>CLUE I cohort:<br>Race, sex, date of birth,<br>date of blood sample<br>donation<br>NHS cohort:<br>None | <b>Σ PCB</b><br>Janus cohort   | Median 1048.3 ng/g lipid           | 44              | 48            | 1.0                                                                                        | reference       | NR           | BMI, smoking status,<br>sex, county, age at<br>examination, date of<br>examination         |
|                                                                         |                                                                   |                                                                                                                                                                                       |                                | Median 1398.3 ng/g lipid           | 48              | 47            | 1.1                                                                                        | 0.7 2.0         |              |                                                                                            |
|                                                                         |                                                                   |                                                                                                                                                                                       |                                | Median 1674.9 ng/g lipid           | 38              | 48            | 1.0                                                                                        | 0.5 1.9         |              |                                                                                            |
|                                                                         |                                                                   |                                                                                                                                                                                       |                                | Median 2148.2 ng/g lipid           | 60              | 47            | 1.7                                                                                        | 0.8 3.4         |              |                                                                                            |
|                                                                         |                                                                   |                                                                                                                                                                                       | CLUE I cohort                  | Median 551.4 ng/g lipid            | 10              | 37            | 1.0                                                                                        | reference       | trend <0.005 | Education, current<br>smoking status, race,<br>sex, date of birth, date<br>of blood sample |
|                                                                         |                                                                   |                                                                                                                                                                                       |                                | Median 726.0 ng/g lipid            | 13              | 37            | 1.6                                                                                        | 0.6 4.3         |              |                                                                                            |
|                                                                         |                                                                   |                                                                                                                                                                                       |                                | Median 911.5 ng/g lipid            | 21              | 37            | <b>3.0</b>                                                                                 | <b>1.1 8.3</b>  |              |                                                                                            |
|                                                                         |                                                                   |                                                                                                                                                                                       |                                | Median 1377.3 ng/g lipid           | 30              | 36            | <b>4.6</b>                                                                                 | <b>1.7 12.7</b> |              |                                                                                            |
|                                                                         |                                                                   |                                                                                                                                                                                       | NHS cohort                     | Median 672.6 ng/g lipid            | 3               | 26            | 1.0                                                                                        | reference       | --           | BMI, smoking status,<br>age, p,p'-DDE                                                      |
|                                                                         |                                                                   |                                                                                                                                                                                       |                                | Median 915.2 ng/g lipid            | 12              | 26            | 3.5                                                                                        | 0.8 14.8        |              |                                                                                            |
|                                                                         |                                                                   |                                                                                                                                                                                       |                                | Median 1092.3 ng/g lipid           | 15              | 26            | 4.3                                                                                        | 1.0 18.2        |              |                                                                                            |
|                                                                         |                                                                   |                                                                                                                                                                                       | <b>PCB 118</b><br>Janus cohort | Median 61.5 ng/g lipid             | 42              | 48            | 1.0                                                                                        | reference       | trend <0.05  | BMI, smoking status,<br>sex, county, age at<br>examination, date of<br>examination         |
|                                                                         |                                                                   |                                                                                                                                                                                       |                                | Median 80.6 ng/g lipid             | 43              | 48            | 1.0                                                                                        | 0.5 2.0         |              |                                                                                            |
|                                                                         |                                                                   |                                                                                                                                                                                       |                                | Median 100.0 ng/g lipid            | 47              | 48            | 1.2                                                                                        | 0.6 2.3         |              |                                                                                            |
|                                                                         |                                                                   |                                                                                                                                                                                       |                                | Median 138.7 ng/g lipid            | 58              | 46            | 1.7                                                                                        | 0.9 3.5         |              |                                                                                            |
|                                                                         |                                                                   |                                                                                                                                                                                       | CLUE I cohort                  | Median 99.4 ng/g lipid             | 5               | 37            | 1.0                                                                                        | reference       | trend <0.05  | Education, current<br>smoking status, race,<br>sex, date of birth, date<br>of blood sample |
|                                                                         |                                                                   |                                                                                                                                                                                       |                                | Median 124.6 ng/g lipid            | 23              | 37            | <b>4.9</b>                                                                                 | <b>1.6 15.3</b> |              |                                                                                            |
|                                                                         |                                                                   |                                                                                                                                                                                       |                                | Median 164.9 ng/g lipid            | 17              | 37            | 3.5                                                                                        | 1.0 11.8        |              |                                                                                            |
|                                                                         |                                                                   |                                                                                                                                                                                       | NHS cohort                     | Median 214.7 ng/g lipid            | 29              | 36            | <b>5.4</b>                                                                                 | <b>1.7 17.1</b> | --           | BMI, smoking status,<br>age, p,p'-DDE                                                      |
|                                                                         |                                                                   |                                                                                                                                                                                       |                                | Median 52.1 ng/g lipid             | 5               | 26            | 1.0                                                                                        | reference       |              |                                                                                            |
|                                                                         |                                                                   |                                                                                                                                                                                       |                                | Median 74.8 ng/g lipid             | 13              | 26            | 3.5                                                                                        | 0.9 13.0        |              |                                                                                            |
|                                                                         |                                                                   |                                                                                                                                                                                       | <b>PCB 138</b><br>Janus cohort | Median 91.2 ng/g lipid             | 51              | 48            | 1.0                                                                                        | reference       | trend <0.05  | BMI, smoking status,<br>sex, county, age at<br>examination, date of<br>examination         |
|                                                                         |                                                                   |                                                                                                                                                                                       |                                | Median 122.8 ng/g lipid            | 29              | 47            | 0.6                                                                                        | 0.3 1.2         |              |                                                                                            |
|                                                                         |                                                                   |                                                                                                                                                                                       |                                | Median 153.4 ng/g lipid            | 42              | 48            | 0.9                                                                                        | 0.5 1.7         |              |                                                                                            |
| Median 190.0 ng/g lipid                                                 | 68                                                                | 47                                                                                                                                                                                    |                                | 1.7                                | 0.8 3.2         |               |                                                                                            |                 |              |                                                                                            |
| CLUE I cohort                                                           | Median 95.1 ng/g lipid                                            | 8                                                                                                                                                                                     | 37                             | 1.0                                | reference       | trend <0.05   | Education, current<br>smoking status, race,<br>sex, date of birth, date<br>of blood sample |                 |              |                                                                                            |
|                                                                         | Median 129.1 ng/g lipid                                           | 20                                                                                                                                                                                    | 37                             | 2.5                                | 0.9 6.5         |               |                                                                                            |                 |              |                                                                                            |
|                                                                         | Median 164.5 ng/g lipid                                           | 19                                                                                                                                                                                    | 37                             | 2.7                                | 1.0 7.5         |               |                                                                                            |                 |              |                                                                                            |
| NHS cohort                                                              | Median 242.4 ng/g lipid                                           | 27                                                                                                                                                                                    | 36                             | <b>4.4</b>                         | <b>1.5 12.6</b> | --            | BMI, smoking status,<br>age, p,p'-DDE                                                      |                 |              |                                                                                            |
|                                                                         | Median 64.8 ng/g lipid                                            | 4                                                                                                                                                                                     | 26                             | 1.0                                | reference       |               |                                                                                            |                 |              |                                                                                            |
|                                                                         | Median 104.9 ng/g lipid                                           | 10                                                                                                                                                                                    | 26                             | 2.3                                | 0.6 9.4         |               |                                                                                            |                 |              |                                                                                            |
| <b>PCB 153</b><br>Janus cohort                                          | Median 157.1 ng/g lipid                                           | 16                                                                                                                                                                                    | 26                             | 3.4                                | 0.9 13.0        | trend <0.05   | BMI, smoking status,<br>sex, county, age at<br>examination, date of<br>examination         |                 |              |                                                                                            |
|                                                                         | Median 194.5 ng/g lipid                                           | 40                                                                                                                                                                                    | 48                             | 1.0                                | reference       |               |                                                                                            |                 |              |                                                                                            |
|                                                                         | Median 268.1 ng/g lipid                                           | 44                                                                                                                                                                                    | 48                             | 1.2                                | 0.6 2.3         |               |                                                                                            |                 |              |                                                                                            |
|                                                                         | Median 330.2 ng/g lipid                                           | 43                                                                                                                                                                                    | 47                             | 1.2                                | 0.7 2.2         |               |                                                                                            |                 |              |                                                                                            |
| CLUE I cohort                                                           | Median 417.3 ng/g lipid                                           | 63                                                                                                                                                                                    | 47                             | 2.0                                | 1.0 3.9         | trend <0.05   | Education, current<br>smoking status, race,<br>sex, date of birth, date<br>of blood sample |                 |              |                                                                                            |
|                                                                         | Median 92.6 ng/g lipid                                            | 16                                                                                                                                                                                    | 37                             | 1.0                                | reference       |               |                                                                                            |                 |              |                                                                                            |
|                                                                         | Median 122.4 ng/g lipid                                           | 14                                                                                                                                                                                    | 37                             | 1.0                                | 0.4 2.3         |               |                                                                                            |                 |              |                                                                                            |
|                                                                         | Median 163.2 ng/g lipid                                           | 17                                                                                                                                                                                    | 37                             | 1.4                                | 0.5 3.5         |               |                                                                                            |                 |              |                                                                                            |
| NHS cohort                                                              | Median 246.9 ng/g lipid                                           | 27                                                                                                                                                                                    | 36                             | 2.2                                | 0.9 5.2         | --            | BMI, smoking status,<br>age, p,p'-DDE                                                      |                 |              |                                                                                            |
|                                                                         | Median 82.8 ng/g lipid                                            | 4                                                                                                                                                                                     | 26                             | 1.0                                | reference       |               |                                                                                            |                 |              |                                                                                            |
|                                                                         | Median 120.3 ng/g lipid                                           | 13                                                                                                                                                                                    | 26                             | 2.7                                | 0.7 10.0        |               |                                                                                            |                 |              |                                                                                            |
|                                                                         |                                                                   |                                                                                                                                                                                       |                                | Median 180.0 ng/g lipid            | 13              | 26            | 2.7                                                                                        | 0.7 10.5        |              |                                                                                            |

Supplemental Material, Table S1 (continued).

| Citation<br>Study Population                                                                                                          | PCB source                                                                                                        | Control Matching<br>Variables                                                                                                                                      | PCB Congener or<br>Group                                                        | Exposure Level<br>(lipid adjusted) | #<br>Cases | #<br>Controls | OR <sup>a</sup>                 | 95% CI    | p-value                                | Adjustment<br>Variables <sup>b</sup>                                                       |
|---------------------------------------------------------------------------------------------------------------------------------------|-------------------------------------------------------------------------------------------------------------------|--------------------------------------------------------------------------------------------------------------------------------------------------------------------|---------------------------------------------------------------------------------|------------------------------------|------------|---------------|---------------------------------|-----------|----------------------------------------|--------------------------------------------------------------------------------------------|
| Fritschi et al, 2005<br>NHL cases and population<br>control residents of New<br>South Wales or the<br>Australian Capital<br>Territory | Occupational<br>exposure estimated by<br>occupational hygienist<br>based on self-reported<br>occupational history | Frequency matched on<br>age, sex, region of<br>residence                                                                                                           | Ever occupationally<br>exposed to PCBs                                          | No                                 | 682        | 681           | 1.0                             | reference | --                                     | Age, sex, state of<br>residence, ethnic origin                                             |
|                                                                                                                                       |                                                                                                                   |                                                                                                                                                                    |                                                                                 | Yes                                | 12         | 13            | 1.10                            | 0.49 2.44 |                                        |                                                                                            |
|                                                                                                                                       |                                                                                                                   |                                                                                                                                                                    | Probability of exposure to<br>PCBs                                              | No                                 | NR         | NR            | 1.0                             | reference | --                                     |                                                                                            |
|                                                                                                                                       |                                                                                                                   |                                                                                                                                                                    |                                                                                 | Possible                           | NR         | NR            | 0.40                            | 0.12 1.31 |                                        |                                                                                            |
|                                                                                                                                       |                                                                                                                   |                                                                                                                                                                    |                                                                                 | Probable                           | NR         | NR            | 4.54                            | 0.97 21.2 |                                        |                                                                                            |
|                                                                                                                                       |                                                                                                                   |                                                                                                                                                                    | Level of exposure to PCBs                                                       | None                               | NR         | NR            | 1.0                             | reference | trend 0.90                             |                                                                                            |
| Low                                                                                                                                   | NR                                                                                                                | NR                                                                                                                                                                 |                                                                                 | 1.91                               | 0.75 4.85  |               |                                 |           |                                        |                                                                                            |
| Medium                                                                                                                                | NR                                                                                                                | NR                                                                                                                                                                 |                                                                                 | 0.78                               | 0.17 3.5   |               |                                 |           |                                        |                                                                                            |
| High                                                                                                                                  | NR                                                                                                                | NR                                                                                                                                                                 |                                                                                 | ---                                | ---        |               |                                 |           |                                        |                                                                                            |
| Frequency of exposure to<br>PCBs                                                                                                      | Never                                                                                                             | NR                                                                                                                                                                 | NR                                                                              | 1.0                                | reference  | trend 0.60    |                                 |           |                                        |                                                                                            |
|                                                                                                                                       | ≤4 days per year                                                                                                  | NR                                                                                                                                                                 | NR                                                                              | 1.44                               | 0.49 4.22  |               |                                 |           |                                        |                                                                                            |
|                                                                                                                                       | >4 days per year                                                                                                  | NR                                                                                                                                                                 | NR                                                                              | 1.15                               | 0.35 3.81  |               |                                 |           |                                        |                                                                                            |
| Years of exposure to PCBs                                                                                                             | Never                                                                                                             | NR                                                                                                                                                                 | NR                                                                              | 1.0                                | reference  | trend 0.80    |                                 |           |                                        |                                                                                            |
|                                                                                                                                       | <5 years                                                                                                          | NR                                                                                                                                                                 | NR                                                                              | 1.04                               | 0.26 4.19  |               |                                 |           |                                        |                                                                                            |
|                                                                                                                                       | ≥5 years                                                                                                          | NR                                                                                                                                                                 | NR                                                                              | 1.13                               | 0.43 2.97  |               |                                 |           |                                        |                                                                                            |
| Greenland et al, 1994<br>Mortality study among<br>employees at a<br>transformer<br>manufacturing plant in the<br>US                   | Occupational<br>exposure estimated<br>based on work history<br>records                                            | None.<br>Controls were workers<br>who died of causes<br>thought to be unrelated<br>to the occupational<br>exposures under study                                    | Exposure to Pyranol (a<br>mixture of ~50% PCBs<br>and ~50%<br>trichlorobenzene) | Indirect or no exposure            | NR         | NR            | 1.0                             | reference | trend >0.40                            | Age, death year                                                                            |
|                                                                                                                                       |                                                                                                                   |                                                                                                                                                                    |                                                                                 | Direct exposure                    | NR         | NR            | 3.26 <sup>c</sup>               | 1.14 9.32 |                                        |                                                                                            |
|                                                                                                                                       |                                                                                                                   |                                                                                                                                                                    | Indirect or no exposure                                                         | NR                                 | NR         | 1.0           | reference                       | p=0.42    | Age at death, death year,<br>hire year |                                                                                            |
| 97th percentile of exposure<br>(in controls)                                                                                          | NR                                                                                                                | NR                                                                                                                                                                 | 1.5 <sup>c</sup>                                                                | 0.55 4.3                           |            |               |                                 |           |                                        |                                                                                            |
| Hardell et al, 1996/1997<br>NHL cases and surgical<br>controls in Sweden                                                              | Adipose                                                                                                           | Frequency matched on<br>age and sex                                                                                                                                | Σ PCBs                                                                          | below median (1300 ng/g lipid)     | NR         | NR            | 1.0                             | reference | --                                     | --                                                                                         |
|                                                                                                                                       |                                                                                                                   |                                                                                                                                                                    |                                                                                 | above median (1300 ng/g lipid)     | 16         | NR            | 2.7                             | 0.8 9.4   |                                        |                                                                                            |
|                                                                                                                                       |                                                                                                                   |                                                                                                                                                                    | Σ PCBs                                                                          | below median (1300 ng/g lipid)     | NR         | NR            | 1.0                             | reference | --                                     | Age, sex                                                                                   |
|                                                                                                                                       |                                                                                                                   |                                                                                                                                                                    |                                                                                 | above median (1300 ng/g lipid)     | NR         | NR            | 1.8                             | 0.4 7.4   |                                        |                                                                                            |
| Hardell et al, 2001<br>NHL cases, surgical<br>controls, and population<br>controls in Sweden                                          | Adipose or plasma                                                                                                 | Surgical patient<br>controls (n=47)<br>frequency matched on<br>age and sex;<br>Controls randomly<br>sampled from<br>population (n=36)<br>matched on age and<br>sex | Σ PCBs                                                                          | below median (1020 ng/g lipid)     | 31         | 42            | 1.0                             | reference | --                                     | Age, sex, BMI,<br>specimen type                                                            |
|                                                                                                                                       |                                                                                                                   |                                                                                                                                                                    |                                                                                 | above median (1020 ng/g lipid)     | 51         | 41            | 1.8                             | 0.85 3.9  |                                        |                                                                                            |
|                                                                                                                                       |                                                                                                                   |                                                                                                                                                                    | Σ PCBs                                                                          | below median (1020 ng/g lipid)     | 53         | 51            | 1.0                             | reference | --                                     | Age, sex, BMI,<br>specimen type,<br>hexachlorobenzene, p,p'-<br>DDE, Σ chlordanes,<br>TBDE |
|                                                                                                                                       |                                                                                                                   |                                                                                                                                                                    |                                                                                 | above median (1020 ng/g lipid)     | 29         | 32            | 1.1                             | 0.28 3.9  |                                        |                                                                                            |
| Σ Immunotoxic PCBs                                                                                                                    | below median (355 ng/g lipid)                                                                                     | 25                                                                                                                                                                 | 40                                                                              | 1.0                                | reference  | --            | Age, sex, BMI,<br>specimen type |           |                                        |                                                                                            |
|                                                                                                                                       | above median (355 ng/g lipid)                                                                                     | 57                                                                                                                                                                 | 43                                                                              | 3.2                                | 1.4 7.4    |               |                                 |           |                                        |                                                                                            |

Supplemental Material, Table S1 (continued).

| Citation<br>Study Population                                          | PCB source                    | Control Matching<br>Variables                                      | PCB Congener or<br>Group      | Exposure Level<br>(lipid adjusted) | #<br>Cases | #<br>Controls | OR <sup>a</sup> | 95% CI           | p-value    | Adjustment<br>Variables <sup>b</sup>                                                                                                                                      |
|-----------------------------------------------------------------------|-------------------------------|--------------------------------------------------------------------|-------------------------------|------------------------------------|------------|---------------|-----------------|------------------|------------|---------------------------------------------------------------------------------------------------------------------------------------------------------------------------|
| Hardell et al, 2009<br>NHL cases and population<br>controls in Sweden | Plasma                        | Frequency matched on<br>age and sex                                | Σ PCBs                        | below median (646 ng/g lipid)      | 40         | 50            | 1.0             | reference        | --         | Age, sex, BMI                                                                                                                                                             |
|                                                                       |                               |                                                                    |                               | above median (646 ng/g lipid)      | 59         | 49            | 2.0             | 0.99 3.9         |            |                                                                                                                                                                           |
|                                                                       |                               |                                                                    | Σ Lower chlorinated PCBs      | below median (8.1 ng/g lipid)      | 52         | 50            | 1.0             | reference        | --         |                                                                                                                                                                           |
|                                                                       |                               |                                                                    |                               | above median (8.1 ng/g lipid)      | 47         | 49            | 1.1             | 0.6 2.0          |            |                                                                                                                                                                           |
|                                                                       |                               |                                                                    | Σ Moderately chlorinated PCBs | below median (559 ng/g lipid)      | 41         | 50            | 1.0             | reference        | --         |                                                                                                                                                                           |
|                                                                       |                               |                                                                    |                               | above median (559 ng/g lipid)      | 58         | 49            | 1.8             | 0.9 3.6          |            |                                                                                                                                                                           |
| Σ Higher chlorinated PCBs                                             | below median (13 ng/g lipid)  | 36                                                                 | 50                            | 1.0                                | reference  | --            |                 |                  |            |                                                                                                                                                                           |
|                                                                       | above median (13 ng/g lipid)  | 63                                                                 | 49                            | 1.7                                | 0.8 3.4    |               |                 |                  |            |                                                                                                                                                                           |
| Σ Immunotoxic PCBs                                                    | below median (226 ng/g lipid) | 45                                                                 | 50                            | 1.0                                | reference  | --            |                 |                  |            |                                                                                                                                                                           |
|                                                                       | above median (226 ng/g lipid) | 54                                                                 | 49                            | 1.5                                | 0.8 3.4    |               |                 |                  |            |                                                                                                                                                                           |
| Laden et al, 2010<br>Nurses' Health Study                             | Plasma                        | Age, race, month of<br>blood draw, fasting<br>status at blood draw | Σ PCBs                        | median 406.9 ng/g lipid            | 33         | 72            | 1.0             | reference        | trend 0.76 | Race, age at blood draw,<br>year and month of blood<br>draw, fasting status at<br>blood draw, region,<br>BMI, current smoking<br>status, parity/<br>breastfeeding, height |
|                                                                       |                               |                                                                    |                               | median 547.8 ng/g lipid            | 41         | 73            | 1.25            | 0.68 2.28        |            |                                                                                                                                                                           |
|                                                                       |                               |                                                                    |                               | median 678.0 ng/g lipid            | 41         | 73            | 1.32            | 0.71 2.43        |            |                                                                                                                                                                           |
|                                                                       |                               |                                                                    |                               | median 945.4 ng/g lipid            | 30         | 72            | 1.02            | 0.53 1.95        |            |                                                                                                                                                                           |
|                                                                       |                               |                                                                    | Σ Immunotoxic PCBs            | median 75.6 ng/g lipid             | 34         | 72            | 1.0             | reference        | trend 0.48 |                                                                                                                                                                           |
|                                                                       |                               |                                                                    |                               | median 111.5 ng/g lipid            | 56         | 73            | <b>1.83</b>     | <b>1.01 3.31</b> |            |                                                                                                                                                                           |
|                                                                       |                               |                                                                    |                               | median 149.6 ng/g lipid            | 30         | 73            | 0.94            | 0.51 1.76        |            |                                                                                                                                                                           |
|                                                                       |                               |                                                                    |                               | median 228.7 ng/g lipid            | 25         | 72            | 0.89            | 0.45 1.77        |            |                                                                                                                                                                           |
|                                                                       |                               |                                                                    | Σ PCB 118, 138, 153, 180      | median 185.7 ng/g lipid            | 33         | 72            | 1.0             | reference        | trend 0.63 |                                                                                                                                                                           |
|                                                                       |                               |                                                                    |                               | median 257.5 ng/g lipid            | 36         | 73            | 1.04            | 0.57 1.92        |            |                                                                                                                                                                           |
|                                                                       |                               |                                                                    |                               | median 334.4 ng/g lipid            | 48         | 73            | 1.63            | 0.90 2.95        |            |                                                                                                                                                                           |
|                                                                       |                               |                                                                    |                               | median 471.7 ng/g lipid            | 28         | 72            | 0.91            | 0.48 1.75        |            |                                                                                                                                                                           |
|                                                                       |                               |                                                                    | PCB 118                       | median 27.4 ng/g lipid             | 38         | 72            | 1.0             | reference        | trend 0.42 |                                                                                                                                                                           |
|                                                                       |                               |                                                                    |                               | median 42.9 ng/g lipid             | 49         | 73            | 1.39            | 0.78 2.47        |            |                                                                                                                                                                           |
|                                                                       |                               |                                                                    |                               | median 61.0 ng/g lipid             | 31         | 73            | 0.89            | 0.48 1.64        |            |                                                                                                                                                                           |
|                                                                       |                               |                                                                    |                               | median 104.7 ng/g lipid            | 27         | 72            | 0.81            | 0.42 1.56        |            |                                                                                                                                                                           |
|                                                                       |                               |                                                                    | PCB 138                       | median 34.3 ng/g lipid             | 31         | 72            | 1.0             | reference        | trend 0.59 |                                                                                                                                                                           |
|                                                                       |                               |                                                                    |                               | median 53.2 ng/g lipid             | 39         | 73            | 1.33            | 0.73 2.40        |            |                                                                                                                                                                           |
|                                                                       |                               |                                                                    |                               | median 75.7 ng/g lipid             | 48         | 73            | 1.61            | 0.89 2.92        |            |                                                                                                                                                                           |
|                                                                       |                               |                                                                    |                               | median 113.3 ng/g lipid            | 27         | 72            | 0.95            | 0.49 1.83        |            |                                                                                                                                                                           |
|                                                                       |                               |                                                                    | PCB 153                       | median 64.9 ng/g lipid             | 37         | 72            | 1.0             | reference        | trend 0.55 |                                                                                                                                                                           |
|                                                                       |                               |                                                                    |                               | median 91.2 ng/g lipid             | 33         | 73            | 0.85            | 0.47 1.54        |            |                                                                                                                                                                           |
|                                                                       |                               |                                                                    |                               | median 120.3 ng/g lipid            | 45         | 73            | 1.38            | 0.76 2.51        |            |                                                                                                                                                                           |
|                                                                       |                               |                                                                    |                               | median 170 ng/g lipid              | 30         | 72            | 0.82            | 0.43 1.56        |            |                                                                                                                                                                           |
| PCB 180                                                               | median 47.8 ng/g lipid        | 36                                                                 | 72                            | 1.0                                | reference  | trend 0.82    |                 |                  |            |                                                                                                                                                                           |
|                                                                       | median 63.4 ng/g lipid        | 33                                                                 | 73                            | 1.02                               | 0.54 1.93  |               |                 |                  |            |                                                                                                                                                                           |
|                                                                       | median 80.5 ng/g lipid        | 44                                                                 | 73                            | 1.24                               | 0.66 2.31  |               |                 |                  |            |                                                                                                                                                                           |
|                                                                       | median 109.4 ng/g lipid       | 32                                                                 | 72                            | 1.03                               | 0.52 2.02  |               |                 |                  |            |                                                                                                                                                                           |

Supplemental Material, Table S1 (continued).

| Citation<br>Study Population                                                                                                                     | PCB source                                                                                        | Control Matching<br>Variables                                                                                                                           | PCB Congener or<br>Group                                                                  | Exposure Level<br>(lipid adjusted) | #<br>Cases | #<br>Controls | OR <sup>a</sup> | 95% CI          | p-value            | Adjustment<br>Variables <sup>b</sup>                                                                                                                         |
|--------------------------------------------------------------------------------------------------------------------------------------------------|---------------------------------------------------------------------------------------------------|---------------------------------------------------------------------------------------------------------------------------------------------------------|-------------------------------------------------------------------------------------------|------------------------------------|------------|---------------|-----------------|-----------------|--------------------|--------------------------------------------------------------------------------------------------------------------------------------------------------------|
| <b>Maifredi et al, 2010</b><br>Residents of a municipality in Brescia, Italy with soil contamination by PCBs from a PCB-production factory       | Lifetime residential history in a contaminated area (based on PCB concentrations in soil samples) | Frequency matched on age and sex                                                                                                                        | Σ PCBs in soil<br><i>All cases (incident and deaths)</i>                                  | area D                             | 462        | 1394          | 1.0             | reference       |                    | Age, gender                                                                                                                                                  |
|                                                                                                                                                  |                                                                                                   |                                                                                                                                                         |                                                                                           | area A                             | 1          | 8             | 0.4             | 0.1 3.0         | NR                 |                                                                                                                                                              |
|                                                                                                                                                  |                                                                                                   |                                                                                                                                                         |                                                                                           | area B                             | 25         | 55            | 1.4             | 0.8 2.2         | NR                 |                                                                                                                                                              |
|                                                                                                                                                  |                                                                                                   |                                                                                                                                                         |                                                                                           | area C                             | 7          | 10            | 2.1             | 0.8 5.5         | NR                 |                                                                                                                                                              |
|                                                                                                                                                  |                                                                                                   |                                                                                                                                                         | areas A, B, C                                                                             | 33                                 | 73         | 1.4           | 0.9 2.1         | NR              |                    |                                                                                                                                                              |
|                                                                                                                                                  | Area D:<br>least contaminated area                                                                |                                                                                                                                                         | Σ PCBs in soil<br><i>Incident cases only</i>                                              | area D                             | 265        | 1394          | 1.0             | reference       |                    | Age, gender                                                                                                                                                  |
|                                                                                                                                                  | Area A:<br>most highly contaminated area                                                          |                                                                                                                                                         | area A                                                                                    | 1                                  | 8          | 0.7           | 0.1 5.5         | NR              |                    |                                                                                                                                                              |
|                                                                                                                                                  | Area B:<br>Intermediate levels of contamination                                                   |                                                                                                                                                         | area B                                                                                    | 17                                 | 55         | 1.6           | 0.9 2.8         | NR              |                    |                                                                                                                                                              |
|                                                                                                                                                  | Area C:<br>Intermediate levels of contamination (lower than area B)                               |                                                                                                                                                         | area C                                                                                    | 4                                  | 10         | 2.0           | 0.6 6.6         | NR              |                    |                                                                                                                                                              |
|                                                                                                                                                  |                                                                                                   |                                                                                                                                                         | areas A, B, C                                                                             | 22                                 | 73         | 1.6           | 0.9 2.5         | p=0.08          |                    |                                                                                                                                                              |
|                                                                                                                                                  |                                                                                                   |                                                                                                                                                         | Σ PCBs in soil<br><i>All cases (incident and deaths); 10+ years duration of residence</i> | area D                             | 394        | 1208          | 1.0             | reference       |                    | Age, gender                                                                                                                                                  |
|                                                                                                                                                  |                                                                                                   |                                                                                                                                                         | area A                                                                                    | 15                                 | 26         | 1.8           | 0.9 3.9         | p=0.08          |                    |                                                                                                                                                              |
|                                                                                                                                                  |                                                                                                   |                                                                                                                                                         | area B                                                                                    | 55                                 | 129        | 1.3           | 0.9 1.8         | NR              |                    |                                                                                                                                                              |
|                                                                                                                                                  |                                                                                                   |                                                                                                                                                         | area C                                                                                    | 12                                 | 25         | 1.5           | 0.7 3.0         | NR              |                    |                                                                                                                                                              |
|                                                                                                                                                  |                                                                                                   |                                                                                                                                                         | areas A, B, C                                                                             | 80                                 | 176        | <b>1.4</b>    | <b>1.1 1.8</b>  | <b>p=0.02</b>   |                    |                                                                                                                                                              |
|                                                                                                                                                  |                                                                                                   |                                                                                                                                                         | Σ PCBs in soil<br><i>Incident cases only; 10+ years duration of residence</i>             | area D                             | 394        | 1208          | 1.0             | reference       |                    | Age, gender                                                                                                                                                  |
|                                                                                                                                                  |                                                                                                   |                                                                                                                                                         | area A                                                                                    | 8                                  | 26         | 1.7           | 0.7 3.8         | NR              |                    |                                                                                                                                                              |
|                                                                                                                                                  |                                                                                                   |                                                                                                                                                         | area B                                                                                    | 31                                 | 129        | 1.2           | 0.8 1.9         | NR              |                    |                                                                                                                                                              |
|                                                                                                                                                  |                                                                                                   |                                                                                                                                                         | area C                                                                                    | 6                                  | 25         | 1.2           | 0.5 3.0         | NR              |                    |                                                                                                                                                              |
|                                                                                                                                                  |                                                                                                   |                                                                                                                                                         | areas A, B, C                                                                             | 44                                 | 176        | 1.3           | 0.9 1.8         | NR              |                    |                                                                                                                                                              |
| <b>Morton et al, 2008</b><br>NCL-SEER study                                                                                                      | Carpet dust                                                                                       | Frequency matched on age, sex, race, study center                                                                                                       | PCB 180                                                                                   | <20.8 ng/g                         | 499        | 395           | 1.0             | reference       |                    | Age, sex, race, study center, education                                                                                                                      |
|                                                                                                                                                  |                                                                                                   |                                                                                                                                                         |                                                                                           | 20.8-44.3 ng/g                     | 92         | 60            | 1.3             | 0.9 1.9         | trend 0.07         |                                                                                                                                                              |
|                                                                                                                                                  |                                                                                                   |                                                                                                                                                         |                                                                                           | ≥44.4 ng/g                         | 91         | 58            | 1.4             | 1.0 2.0         |                    |                                                                                                                                                              |
| <b>Nordstrom et al, 2000</b><br>Hairy-cell leukemia cases and population controls in Sweden                                                      | Plasma                                                                                            | Age, sex, county                                                                                                                                        | Σ PCBs                                                                                    | ≤831.6 ng/g lipid                  | 31         | 27            | 1.0             | reference       | --                 | Age, BMI, exposure to herbicides, fungicides, insecticides, impregnating agents, organic solvents, animals, exhausts                                         |
|                                                                                                                                                  |                                                                                                   |                                                                                                                                                         |                                                                                           | >831.6 ng/g lipid                  | 23         | 27            | 0.8             | 0.3 1.9         |                    |                                                                                                                                                              |
| <b>Quintana et al, 2004</b><br>Cadaver and surgical patient adipose samples for NHL cases, accident victim controls, and MI controls from the US | Adipose                                                                                           | Age, sex, geographic region, race                                                                                                                       | Σ PCBs                                                                                    | Trace, not detected, or <1 ppm     | 79         | 184           | 1.0             | reference       |                    | Year of sample collection                                                                                                                                    |
|                                                                                                                                                  |                                                                                                   |                                                                                                                                                         |                                                                                           | 1-3 ppm                            | 50         | 151           | 1.05            | 0.63 1.76       | --                 |                                                                                                                                                              |
|                                                                                                                                                  |                                                                                                   |                                                                                                                                                         |                                                                                           | >3 ppm                             | 9          | 23            | 1.08            | 0.40 2.92       |                    |                                                                                                                                                              |
| <b>Rothman et al, 1997</b><br>CLUE I cohort                                                                                                      | Serum                                                                                             | Race, sex, date of birth, participation in CLUE I or CLUE I/II, date of sample donation, participation in further surveys, location of specimen storage | Σ PCBs                                                                                    | 247-641 ng/g lipid                 | 10         | 37            | 1.00            | reference       |                    | DDT, race, sex, date of birth, participation in CLUE I or CLUE I/II, date of sample donation, participation in further surveys, location of specimen storage |
|                                                                                                                                                  |                                                                                                   |                                                                                                                                                         |                                                                                           | 649-806 ng/g lipid                 | 13         | 37            | 1.3             | 0.5 3.3         | <b>trend 0.002</b> |                                                                                                                                                              |
|                                                                                                                                                  |                                                                                                   |                                                                                                                                                         |                                                                                           | 814-1060 ng/g lipid                | 21         | 37            | 2.7             | 0.9 7.8         |                    |                                                                                                                                                              |
|                                                                                                                                                  |                                                                                                   |                                                                                                                                                         |                                                                                           | 1070-2070 ng/g lipid               | 30         | 36            | <b>4.1</b>      | <b>1.4 11.9</b> |                    |                                                                                                                                                              |

Supplemental Material, Table S1 (continued).

| Citation<br>Study Population                                                                | PCB source              | Control Matching<br>Variables                             | PCB Congener or<br>Group | Exposure Level<br>(lipid adjusted) | #<br>Cases       | #<br>Controls | OR <sup>a</sup> | 95% CI                                                | p-value | Adjustment<br>Variables <sup>b</sup> |                                       |
|---------------------------------------------------------------------------------------------|-------------------------|-----------------------------------------------------------|--------------------------|------------------------------------|------------------|---------------|-----------------|-------------------------------------------------------|---------|--------------------------------------|---------------------------------------|
| Spinelli et al, 2007<br>NHL cases and population<br>controls in British<br>Columbia, Canada | Plasma                  | Frequency matched on<br>sex, age, residential<br>location | Σ PCBs                   | ≤100.9 ng/g lipid                  | 81               | 115           | 1.00            | reference                                             |         | trend 0.001                          | Age, family history of<br>NHL         |
|                                                                                             |                         |                                                           |                          | >100.9-155.6 ng/g lipid            | 103              | 114           | 1.41            | 0.93 2.14                                             |         |                                      |                                       |
|                                                                                             |                         |                                                           |                          | >155.6-220.0 ng/g lipid            | 77               | 115           | 1.11            | 0.71 1.74                                             |         |                                      |                                       |
|                                                                                             |                         |                                                           |                          | >220.0-6571 ng/g lipid             | 142              | 115           | <b>2.14</b>     | <b>1.38 3.30</b>                                      |         |                                      |                                       |
|                                                                                             |                         |                                                           | Σ Dioxin-like PCBs       | ≤10.12 ng/g lipid                  | 82               | 115           | 1.00            | reference                                             |         | trend <0.001                         | Age, farming                          |
|                                                                                             |                         |                                                           |                          | >10.12-15.35 ng/g lipid            | 96               | 114           | 1.41            | 0.91 2.16                                             |         |                                      |                                       |
|                                                                                             |                         |                                                           |                          | >15.35-23.72 ng/g lipid            | 82               | 115           | 1.57            | 1.00 2.46                                             |         |                                      |                                       |
|                                                                                             |                         |                                                           |                          | >23.72-280.8 ng/g lipid            | 143              | 115           | <b>2.40</b>     | <b>1.53 3.77</b>                                      |         |                                      |                                       |
|                                                                                             |                         |                                                           | Σ Non-dioxin-like PCBs   | ≤88.57 ng/g lipid                  | 85               | 115           | 1.00            | reference                                             |         | trend <0.001                         | Age, region, family<br>history of NHL |
|                                                                                             |                         |                                                           |                          | >88.57-136.2 ng/g lipid            | 96               | 115           | 1.30            | 0.85 1.97                                             |         |                                      |                                       |
|                                                                                             |                         |                                                           |                          | >136.2-196.4 ng/g lipid            | 93               | 115           | 1.19            | 0.76 1.86                                             |         |                                      |                                       |
|                                                                                             |                         |                                                           |                          | >196.4-6445 ng/g lipid             | 148              | 115           | <b>2.18</b>     | <b>1.41 3.38</b>                                      |         |                                      |                                       |
|                                                                                             |                         |                                                           | PCB 105                  | not detected                       | 281              | 316           | 1.00            | reference                                             |         | trend 0.675                          | Education                             |
|                                                                                             |                         |                                                           |                          | >1.32-37.65 ng/g lipid             | 132              | 139           | 1.06            | 0.80 1.42                                             |         |                                      |                                       |
|                                                                                             |                         |                                                           | PCB 118                  | ≤4.57 ng/g lipid                   | 82               | 109           | 1.00            | reference                                             |         | trend 0.004                          | Age, BMI, farming                     |
|                                                                                             |                         |                                                           |                          | >4.57-7.78 ng/g lipid              | 88               | 113           | 1.12            | 0.74 1.69                                             |         |                                      |                                       |
|                                                                                             |                         |                                                           |                          | >7.78-12.85 ng/g lipid             | 95               | 114           | 1.23            | 0.81 1.88                                             |         |                                      |                                       |
|                                                                                             |                         |                                                           |                          | >12.85-202.1 ng/g lipid            | 129              | 113           | <b>1.77</b>     | <b>1.15 2.72</b>                                      |         |                                      |                                       |
|                                                                                             |                         |                                                           | PCB 156                  | ≤3.65 ng/g lipid                   | 85               | 114           | 1.00            | reference                                             |         | trend 0.004                          | Age, farming                          |
|                                                                                             |                         |                                                           |                          | >3.65-5.51 ng/g lipid              | 85               | 114           | 1.10            | 0.72 1.68                                             |         |                                      |                                       |
| >5.51-8.32 ng/g lipid                                                                       | 105                     | 115                                                       |                          | 1.43                               | 0.93 2.21        |               |                 |                                                       |         |                                      |                                       |
| >8.32-113.3 ng/g lipid                                                                      | 128                     | 115                                                       |                          | <b>1.77</b>                        | <b>1.14 2.74</b> |               |                 |                                                       |         |                                      |                                       |
| PCB 28                                                                                      | not detected            | 348                                                       | 376                      | 1.00                               | reference        |               | trend 0.779     | None                                                  |         |                                      |                                       |
|                                                                                             | >1.38-54.47 ng/g lipid  | 74                                                        | 84                       | 0.95                               | 0.67 1.34        |               |                 |                                                       |         |                                      |                                       |
| PCB 99                                                                                      | ≤3.06 ng/g lipid        | 106                                                       | 113                      | 1.00                               | reference        |               | trend 0.045     | Age, farming                                          |         |                                      |                                       |
|                                                                                             | >3.06-4.83 ng/g lipid   | 82                                                        | 115                      | 0.78                               | 0.52 1.15        |               |                 |                                                       |         |                                      |                                       |
|                                                                                             | >4.83-7.78 ng/g lipid   | 85                                                        | 115                      | 0.81                               | 0.54 1.21        |               |                 |                                                       |         |                                      |                                       |
|                                                                                             | >7.78-61.34 ng/g lipid  | 130                                                       | 115                      | 1.27                               | 0.86 1.87        |               |                 |                                                       |         |                                      |                                       |
| PCB 138                                                                                     | ≤11.61 ng/g lipid       | 100                                                       | 115                      | 1.00                               | reference        |               | trend 0.02      | Age                                                   |         |                                      |                                       |
|                                                                                             | >11.61-19.28 ng/g lipid | 90                                                        | 115                      | 0.93                               | 0.62 1.38        |               |                 |                                                       |         |                                      |                                       |
|                                                                                             | >19.28-29.72 ng/g lipid | 94                                                        | 115                      | 0.99                               | 0.66 1.50        |               |                 |                                                       |         |                                      |                                       |
|                                                                                             | >29.72-289.4 ng/g lipid | 138                                                       | 115                      | 1.46                               | 0.98 2.18        |               |                 |                                                       |         |                                      |                                       |
| PCB 153                                                                                     | ≤25.29 ng/g lipid       | 90                                                        | 115                      | 1.00                               | reference        |               | trend 0.002     | Age                                                   |         |                                      |                                       |
|                                                                                             | >25.29-38.68 ng/g lipid | 86                                                        | 115                      | 1.04                               | 0.68 1.57        |               |                 |                                                       |         |                                      |                                       |
|                                                                                             | >38.68-59.0 ng/g lipid  | 106                                                       | 115                      | 1.34                               | 0.87 2.04        |               |                 |                                                       |         |                                      |                                       |
|                                                                                             | >59.0-735.9 ng/g lipid  | 140                                                       | 115                      | <b>1.79</b>                        | <b>1.17 2.72</b> |               |                 |                                                       |         |                                      |                                       |
| PCB 170                                                                                     | ≤7.16 ng/g lipid        | 88                                                        | 115                      | 1.00                               | reference        |               | trend 0.005     | Age                                                   |         |                                      |                                       |
|                                                                                             | >7.16-11.17 ng/g lipid  | 93                                                        | 115                      | 1.17                               | 0.77 1.79        |               |                 |                                                       |         |                                      |                                       |
|                                                                                             | >11.17-17.23 ng/g lipid | 107                                                       | 115                      | 1.41                               | 0.91 2.18        |               |                 |                                                       |         |                                      |                                       |
|                                                                                             | >17.23-901.5 ng/g lipid | 134                                                       | 115                      | <b>1.80</b>                        | <b>1.16 2.79</b> |               |                 |                                                       |         |                                      |                                       |
| PCB 180                                                                                     | ≤21.93 ng/g lipid       | 85                                                        | 111                      | 1.00                               | reference        |               | trend 0.005     | Age, sex, BMI,<br>ethnicity, family history<br>of NHL |         |                                      |                                       |
|                                                                                             | >21.93-35.63 ng/g lipid | 94                                                        | 110                      | 1.28                               | 0.82 2.00        |               |                 |                                                       |         |                                      |                                       |
|                                                                                             | >35.63-54.72 ng/g lipid | 89                                                        | 115                      | 1.25                               | 0.78 2.00        |               |                 |                                                       |         |                                      |                                       |
|                                                                                             | >54.72-3787 ng/g lipid  | 126                                                       | 113                      | <b>1.91</b>                        | <b>1.19 3.07</b> |               |                 |                                                       |         |                                      |                                       |
| PCB 183                                                                                     | not detected            | 162                                                       | 177                      | 1.00                               | reference        |               | trend 0.113     | Age                                                   |         |                                      |                                       |
|                                                                                             | >1.87-3.95 ng/g lipid   | 107                                                       | 142                      | 0.83                               | 0.59 1.18        |               |                 |                                                       |         |                                      |                                       |
|                                                                                             | >3.95-84.86 ng/g lipid  | 153                                                       | 141                      | 1.22                               | 0.87 1.71        |               |                 |                                                       |         |                                      |                                       |
| PCB 187                                                                                     | ≤5.93 ng/g lipid        | 88                                                        | 114                      | 1.00                               | reference        |               | trend 0.003     | Age, education, family<br>history of NHL              |         |                                      |                                       |
|                                                                                             | >5.93-9.82 ng/g lipid   | 98                                                        | 114                      | 1.27                               | 0.83 1.95        |               |                 |                                                       |         |                                      |                                       |
|                                                                                             | >9.82-15.46 ng/g lipid  | 79                                                        | 114                      | 1.04                               | 0.66 1.63        |               |                 |                                                       |         |                                      |                                       |
|                                                                                             | >15.46-833.2 ng/g lipid | 136                                                       | 112                      | <b>1.92</b>                        | <b>1.23 2.98</b> |               |                 |                                                       |         |                                      |                                       |

Supplemental Material, Table S1 (continued).

| Citation<br>Study Population                                                                                                                              | PCB source        | Control Matching<br>Variables   | PCB Congener or<br>Group           | Exposure Level<br>(lipid adjusted) | #<br>Cases       | #<br>Controls | OR <sup>a</sup> | 95% CI             | p-value | Adjustment<br>Variables <sup>b</sup> |
|-----------------------------------------------------------------------------------------------------------------------------------------------------------|-------------------|---------------------------------|------------------------------------|------------------------------------|------------------|---------------|-----------------|--------------------|---------|--------------------------------------|
| Viel et al, 2011<br>Residents of an area of<br>Besancon, France with<br>high levels of dioxin<br>emissions from a<br>municipal solid waste<br>incinerator | Serum             | Sex, age, date of blood<br>draw | Σ Dioxin-like PCBs                 | per pg WHO-TEQ/g lipid             | --               | --            | 1.04            | 1.00 1.07          | p=0.02  | None                                 |
|                                                                                                                                                           |                   |                                 | Σ Non-dioxin-like PCBs             | per 10 ng/g lipid                  | --               | --            | <b>1.02</b>     | <b>1.01 1.05</b>   | p=0.01  |                                      |
|                                                                                                                                                           |                   |                                 | Σ PCDD, PCDF, dioxin-<br>like PCBs | per pg WHO-TEQ/g lipid             | --               | --            | <b>1.04</b>     | <b>1.01 1.05</b>   | p=0.01  |                                      |
|                                                                                                                                                           |                   |                                 | PCB 77                             | per pg WHO-TEQ/g lipid             | --               | --            | ∞               | -- --              | p=0.4   |                                      |
|                                                                                                                                                           |                   |                                 | PCB 126                            | per pg WHO-TEQ/g lipid             | --               | --            | 1.10            | 1.00 1.23          | p=0.04  |                                      |
|                                                                                                                                                           |                   |                                 | PCB 169                            | per pg WHO-TEQ/g lipid             | --               | --            | <b>3.40</b>     | <b>1.11 13.04</b>  | p=0.03  |                                      |
|                                                                                                                                                           |                   |                                 | PCB 105                            | per pg WHO-TEQ/g lipid             | --               | --            | <b>3.29</b>     | <b>1.07 13.41</b>  | p=0.02  |                                      |
|                                                                                                                                                           |                   |                                 | PCB 114                            | per pg WHO-TEQ/g lipid             | --               | --            | 1.55            | 0.97 2.84          | p=0.06  |                                      |
|                                                                                                                                                           |                   |                                 | PCB 118                            | per pg WHO-TEQ/g lipid             | --               | --            | <b>1.21</b>     | <b>1.01 1.53</b>   | p=0.02  |                                      |
|                                                                                                                                                           |                   |                                 | PCB 123                            | per pg WHO-TEQ/g lipid             | --               | --            | ∞               | -- --              | p=0.02  |                                      |
|                                                                                                                                                           |                   |                                 | PCB 156                            | per pg WHO-TEQ/g lipid             | --               | --            | 1.09            | 1.00 1.20          | p=0.02  |                                      |
|                                                                                                                                                           |                   |                                 | PCB 157                            | per pg WHO-TEQ/g lipid             | --               | --            | <b>1.41</b>     | <b>1.03 2.13</b>   | p=0.03  |                                      |
|                                                                                                                                                           |                   |                                 | PCB 167                            | per pg WHO-TEQ/g lipid             | --               | --            | ∞               | -- --              | p=0.02  |                                      |
|                                                                                                                                                           |                   |                                 | PCB 189                            | per pg WHO-TEQ/g lipid             | --               | --            | <b>85.4</b>     | <b>2.12 7349.0</b> | p=0.01  |                                      |
|                                                                                                                                                           |                   |                                 | PCB 138                            | per 10 ng/g lipid                  | --               | --            | <b>1.08</b>     | <b>1.01 1.20</b>   | p=0.03  |                                      |
|                                                                                                                                                           |                   |                                 | PCB 153                            | per 10 ng/g lipid                  | --               | --            | 1.04            | 1.00 1.09          | p=0.03  |                                      |
| PCB 180                                                                                                                                                   | per 10 ng/g lipid | --                              | --                                 | <b>1.08</b>                        | <b>1.01 1.17</b> | p=0.01        |                 |                    |         |                                      |

**Abbreviations:**  
**BMI**, body mass index; **CI**, confidence interval; **CLUE I**, Campaign Against Cancer and Stroke cohort study; **DDE**, dichlorodiphenyldichloroethylene; **DDT**, dichlorodiphenyltrichloroethane; **MI**, myocardial infarction; ng/g, nanograms per gram; **NHL**, non-Hodgkin lymphoma; **NHS**, Nurses' Health Study; **NR**, not reported; **OR**, odds ratio; **PCB**, polychlorinated biphenyl; pg/g, picograms per gram; **ppb**, parts per billion; **ppm**, parts per million; **RR**, relative risk; **TBDE**, 2,2',4,2'-tetrabrominated diphenyl ether; **TEQ**, toxic equivalency quotient; **UDL**, usual detection limit; **WHO**, World Health Organization

<sup>a</sup> Results presented only for main effects of PCB exposure on NHL (overall). NHL subtype-specific analyses not presented.  
<sup>b</sup> In studies with multiple models, fully adjusted models are shown.  
<sup>c</sup> Odds of lymphoma death.

**bold face:** statistically significant results at an alpha of 0.05



**Supplemental Material, Table S2.** Characteristics of Cohort Studies Examining the Association Between Occupational PCB Exposure and NHL or Lymphoma

| Citation              | Cohort                           | Cohort Size (n) | Deaths (n) | Duration of Follow-Up | Notes on Cohort Age or Exposure                                           | Outcome            | O/E        | SMR/SIR (95% CI) |
|-----------------------|----------------------------------|-----------------|------------|-----------------------|---------------------------------------------------------------------------|--------------------|------------|------------------|
| Brown and Jones 1981  | Capacitor manufacturers (NY, MA) | 2,567           | 163        | 35 y (1940-1975)      | ≥30% of cohort employed for ≤2 y                                          | Mortality: L & H   | 2 / 4.34   | 0.46 (p>0.05)    |
| Brown 1987            | Capacitor manufacturers (NY, MA) | 2,588           | 295        | 42 y (1940-1982)      | See Brown and Jones 1981                                                  | Mortality: L & H   | 5 / 7.40   | 0.68 (p>0.05)    |
| Prince et al. 2006a   | Capacitor manufacturers (NY, MA) | 2,572           | 798        | 58 y (1940-1998)      | Median age at first employment= 23.3 y; 49% of cohort employed <5 y       | Mortality: NHL     | 10 / 7.63  | 1.31 (0.63,2.41) |
| Prince et al. 2006b   | Capacitor manufacturers (NY, MA) | 14,458          | 3,417      | 58 y (1940-1998)      | 75% of cohort left employment before age 55                               | Mortality: NHL     | 35 / 35.71 | 0.98 (0.68,1.36) |
| Kimbrough et al. 1999 | Capacitor manufacturers (NY)     | 7,075           | 1,195      | 31 y (1946-1977)      | Mean duration of employment= 5.6 y; Mean age at start of employment= 27 y | Mortality: LS &RS  | 3 / 4.62   | 0.65 (0.13,1.90) |
|                       |                                  |                 |            |                       |                                                                           | Mortality: Other L | 14 / 14.2  | 0.98 (0.54,1.65) |
| Kimbrough et al. 2003 | Capacitor manufacturers (NY)     | 7,075           | 1,654      | 52 y (1946-1998)      | See Kimbrough et al. 1999                                                 | Mortality: LS &RS  | 3 / 4.8    | 0.63 (0.13,1.83) |
|                       |                                  |                 |            |                       |                                                                           | Mortality: Other L | 22 / 21.2  | 1.04 (0.65,1.57) |
| Sinks et al. 1992     | Capacitor manufacturers (IN)     | 3,588           | 192        | 19 y (1957-1986)      | NR                                                                        | Mortality: L & H   | 7 / 7.20   | 1.00 (0.40,2.00) |
| Ruder et al. 2006     | Capacitor manufacturers (IN)     | 3,569           | 547        | 38 y (1960-1998)      | Median age at first employment= 24 y; Median duration of employment=1.3 y | Mortality: NHL     | 9 / 7.32   | 1.23 (0.60,2.30) |

Supplemental Material, Table S2 (continued).

| Citation                      | Cohort                                  | Cohort Size (n) | Deaths (n)          | Duration of Follow-Up | Notes on Cohort Age or Exposure                                                              | Outcome                         | O/E         | SMR/SIR (95% CI) |
|-------------------------------|-----------------------------------------|-----------------|---------------------|-----------------------|----------------------------------------------------------------------------------------------|---------------------------------|-------------|------------------|
| Bertazzi et al. 1982          | Capacitor manufacturers (Italy)         | 1,310           | 27                  | 32 y (1946-1978)      | Employment $\geq$ 6 months required for inclusion; Authors noted “very young age” of workers | Mortality: L & H                | 4 / 0.91    | 4.4 (1.2,12.2)   |
| Bertazzi et al. 1987          | Capacitor manufacturers (Italy)         | 2,100           | 30                  | 36 y (1946-1982)      | NR                                                                                           | Mortality: Hemato               | 3 / 0.80    | 3.75 (p>0.05)    |
| Tironi et al. 1996            | Capacitor manufacturers (Italy)         | 1,556           | 47                  | 36 y (1946-1982)      | NR                                                                                           | Mortality: L & H                | 5 / 3.50    | 1.41 (0.46,3.30) |
| Mallin et al. 2004            | Capacitor manufacturers (IL)            | 2,885           | 1,199               | 66 y (1944-2000)      | >55% of cohort employed for $\leq$ 1 y                                                       | Mortality: LS & RS              | 3 / 1.96    | 1.53 (0.32,4.48) |
|                               |                                         |                 |                     |                       |                                                                                              | Mortality: NHL <sup>a</sup>     | 13 / 7.39   | 1.76 (0.94,3.02) |
| Gustavsson et al. 1997        | Capacitor manufacturers (Sweden)        | 241             | 56                  | 26 y (1965-1991)      | NR                                                                                           | Mortality: Lymphoma             | 1 / 0.39    | 2.54 (0.07,14.2) |
|                               |                                         |                 | 18 incident cancers |                       |                                                                                              | Incidence: NHL                  | 1 / 0.67    | 1.49 (0.02,8.30) |
| Liss et al. 1989 <sup>b</sup> | Transformer manufacturers (Ontario)     | 1,073           | 146                 | 25 y (1960-1985)      | N/A                                                                                          | Mortality: L & H                | 2 / 0.69    | 2.90 (0.3,12.4)  |
| Yassi et al. 1994             | Transformer manufacturers (Canada)      | 812             | 71                  | 39 y (1950-1989)      | NR                                                                                           | Mortality: NHL                  | 2 / 0.79    | 2.54 (0.29,9.17) |
| Loomis et al. 1997            | Electrical power company workers (U.S.) | 138,905         | 20,733              | 38 y (1950-1988)      | Authors noted cohort was “relatively young”                                                  | Mortality: LS & RS              | 69 / 89.6   | 0.77 (0.60,0.97) |
|                               |                                         |                 |                     |                       |                                                                                              | Mortality: Other L <sup>c</sup> | 176 / 169.9 | 1.04 (0.89,1.20) |

Supplemental Material, Table S2 (continued).

| Citation             | Cohort                                                                                              | Cohort Size (n) | Deaths (n)           | Duration of Follow-Up | Notes on Cohort Age or Exposure                                             | Outcome                  | O/E     | SMR/SIR (95% CI)    |
|----------------------|-----------------------------------------------------------------------------------------------------|-----------------|----------------------|-----------------------|-----------------------------------------------------------------------------|--------------------------|---------|---------------------|
| Svensson et al. 1995 | Fishermen from the east coast of Sweden with historically high intake of fatty fish containing POPs | 2,896           | 421                  | 54 y (1935-1988)      | Inclusion required membership in fishermen's organization for $\geq 1$ year | <i>Mortality:</i><br>NHL | 3 / 2.5 | 1.20<br>(0.25-3.49) |
|                      |                                                                                                     |                 | 197 incident cancers | 20 y (1968-1988)      |                                                                             | <i>Incidence:</i><br>NHL | 5 / 5.8 | 0.85<br>(0.28-1.99) |

Abbreviations: **CI**, confidence interval; **E**, expected number of cases in overall cohort; **Hemato**, hematologic malignancies (ICD-8 200-209); **IL**, Illinois; **IN**, Indiana; **L & H**, lymphatic and hematopoietic malignancies; **LS & RS**, lymphosarcoma and reticulosarcoma (ICD-9 200); **MA**, Massachusetts; **N/A**, not available; **NHL**, non-Hodgkin lymphoma; **NR**, no information reported by the authors on age or exposure duration characteristics of the cohort; **NY**, New York; **O**, observed number of cases in overall cohort; **Other L**, other lymphatic and hematopoietic malignancies (ICD-9 202-203); **POPs**, persistent organic pollutants; **SIR**, standardized incidence ratio; **SMR**, standardized mortality ratio; **y**, years.

<sup>a</sup> Among white females in an analysis restricted to 1960-1999, during which time it was possible to re-code malignancies as NHL (data for males not reported).

<sup>b</sup> Data obtained from Ruder et al., 2006.

<sup>c</sup> Includes ICD-9 202 only.

**Supplemental Material, Table S3. Interaction Between PCBs and EBV and Risk of NHL**

| Citation                                                                                                                                                                                                                                                                             | PCB Congener Grouping                      | Exposure Level <sup>a</sup> | Cases (n) | Controls (n)    | OR (95% CI) <sup>b</sup> | Cases (n) | Controls (n)   | OR (95% CI) <sup>b</sup>    |
|--------------------------------------------------------------------------------------------------------------------------------------------------------------------------------------------------------------------------------------------------------------------------------------|--------------------------------------------|-----------------------------|-----------|-----------------|--------------------------|-----------|----------------|-----------------------------|
| Rothman et al. 1997                                                                                                                                                                                                                                                                  | Σ PCBs                                     | <810 ng/g lipid             | 18        | 62              | 1.0 (reference)          | 4         | 11             | 1.0 (0.3, 3.6)              |
|                                                                                                                                                                                                                                                                                      |                                            | ≥810 ng/g lipid             | 39        | 67              | 2.8 (1.2, 6.2)           | 12        | 3              | 22.3 (4.3, 115.0)           |
| Hardell et al. 2001                                                                                                                                                                                                                                                                  | Σ PCBs                                     | ≤1,018 ng/g lipid           | 10        | 15              | 1.0 (reference)          | 16        | 22             | 1.1 (0.39, 3.4)             |
|                                                                                                                                                                                                                                                                                      |                                            | >1,018 ng/g lipid           | 17        | 25              | 1.6 (0.52, 5.1)          | 22        | 12             | 4.0 (1.2, 14.0)             |
|                                                                                                                                                                                                                                                                                      | Σ Immunotoxic PCBs <sup>c</sup>            | ≤348 ng/g lipid             | 9         | 18              | 1.0 (reference)          | 13        | 19             | 1.4 (0.47, 4.3)             |
|                                                                                                                                                                                                                                                                                      |                                            | >348 ng/g lipid             | 18        | 22              | 3.2 (0.99, 11.0)         | 25        | 15             | 6.4 (1.9, 2.4)              |
| Hardell et al. 2009                                                                                                                                                                                                                                                                  | Σ PCBs                                     | ≤646 ng/g lipid             | 14        | 25              | 1.0 (reference)          | 24        | 24             | 2.5 (0.97, 6.4)             |
|                                                                                                                                                                                                                                                                                      |                                            | >646 ng/g lipid             | 20        | 29              | 2.1 (0.7, 6.1)           | 39        | 20             | 5.2 (1.9, 14.0)             |
|                                                                                                                                                                                                                                                                                      | Σ Lower chlorinated PCBs <sup>c</sup>      | ≤8.1 ng/g lipid             | 16        | 26              | 1.0 (reference)          | 34        | 23             | 3.1 (1.3, 7.4)              |
|                                                                                                                                                                                                                                                                                      |                                            | >8.1 ng/g lipid             | 18        | 28              | 1.6 (0.6, 4.2)           | 29        | 21             | 3.0 (1.2, 7.8) <sup>d</sup> |
|                                                                                                                                                                                                                                                                                      | Σ Moderately chlorinated PCBs <sup>c</sup> | ≤559 ng/g lipid             | 14        | 25              | 1.0 (reference)          | 25        | 24             | 2.5 (0.99, 6.5)             |
|                                                                                                                                                                                                                                                                                      |                                            | >559 ng/g lipid             | 20        | 29              | 2.0 (0.7, 5.8)           | 38        | 20             | 5.0 (1.8, 14.0)             |
|                                                                                                                                                                                                                                                                                      | Σ Higher chlorinated PCBs <sup>c</sup>     | ≤13 ng/g lipid              | 14        | 23              | 1.0 (reference)          | 20        | 26             | 1.5 (0.6, 3.8)              |
|                                                                                                                                                                                                                                                                                      |                                            | >13 ng/g lipid              | 20        | 31              | 1.1 (0.4, 3.0)           | 43        | 18             | 3.9 (1.4, 10.0)             |
| Σ Immunotoxic PCBs <sup>c</sup>                                                                                                                                                                                                                                                      | ≤226 ng/g lipid                            | 17                          | 24        | 1.0 (reference) | 26                       | 25        | 1.9 (0.8, 4.6) |                             |
|                                                                                                                                                                                                                                                                                      | >226 ng/g lipid                            | 17                          | 30        | 1.2 (0.4, 3.4)  | 37                       | 19        | 3.7 (1.4, 9.6) |                             |
| Nordstrom et al. 2000 <sup>e</sup>                                                                                                                                                                                                                                                   | Σ PCBs                                     | ≤831.6 ng/g lipid           | 15        | 23              | 1.0 (reference)          | 16        | 4              | 4.4 (0.99, 23.4)            |
|                                                                                                                                                                                                                                                                                      |                                            | >831.6 ng/g lipid           | 10        | 21              | 0.4 (0.1, 1.4)           | 13        | 6              | 4.4 (1.2, 18.5)             |
|                                                                                                                                                                                                                                                                                      | Σ Immunotoxic PCBs <sup>c</sup>            | ≤285.4 ng/g lipid           | 14        | 20              | 1.0 (reference)          | 14        | 7              | 1.7 (0.4, 7.3)              |
|                                                                                                                                                                                                                                                                                      |                                            | >285.4 ng/g lipid           | 11        | 24              | 0.4 (0.1, 1.5)           | 15        | 3              | 11.3 (2.3, 73.1)            |
| <b>Abbreviations:</b> <b>CI</b> , confidence interval; <b>EBV-EA</b> , Epstein-Barr Virus Early Antigen Diffuse and Restricted components (R+D); <b>ng/g</b> , nanograms per gram; <b>NHL</b> , non-Hodgkin lymphoma; <b>OR</b> , odds ratio; <b>PCB</b> , polychlorinated biphenyl. |                                            |                             |           |                 |                          |           |                |                             |
| <sup>a</sup> Dichotomized at the median level in controls. <sup>b</sup> Adjusted odds ratios. <sup>c</sup> As defined by Moysich et al. (1999) <sup>d</sup> Less than expected for biologic interaction <sup>e</sup> Hairy cell leukemia, a subtype of NHL.                          |                                            |                             |           |                 |                          |           |                |                             |

## **Supplemental Material, References.**

Bertazzi PA, Riboldi L, Pesatori AC, Radice L, Zocchetti C. 1987. Cancer mortality of capacitor manufacturing workers. *Am J Ind Med* 11:165-176.

Bertazzi PA, Zocchetti C, Guercilena S, Della Foglia M, Pesatori AC, Riboldi L. 1982. Mortality study of male and female workers exposed to PCB's. In: *Prevention of occupational cancer - International Symposium Geneva: International Labour Office.*

Bertrand KA, Spiegelman D, Aster JC, Altshul LM, Korrick SA, Rodig SJ, et al. 2010. Plasma organochlorine levels and risk of non-Hodgkin lymphoma in a cohort of men. *Epidemiology* 21:172-180.

Brown DP. 1987. Mortality of workers exposed to polychlorinated biphenyls - an update. *Arch Environ Health* 42:333-339.

Brown DP, Jones M. 1981. Mortality and industrial hygiene study of workers exposed to polychlorinated biphenyls. *Arch Environ Health* 36:120-129.

Cocco P, Brennan P, Ibba A, de Sanjose LS, Maynadie M, Nieters A, et al. 2008. Plasma polychlorobiphenyl and organochlorine pesticide level and risk of major lymphoma subtypes. *Occup Environ Med* 65:132-140.

Colt JS, Rothman N, Severson RK, Hartge P, Cerhan JR, Chatterjee N, et al. 2009. Organochlorine exposure, immune gene variation, and risk of non-Hodgkin lymphoma. *Blood* 113:1899-1905.

Colt JS, Severson RK, Lubin J, Rothman N, Camann D, Davis S, et al. 2005. Organochlorines in carpet dust and non-Hodgkin lymphoma. *Epidemiology* 16:516-525.

De Roos AJ, Hartge P, Lubin JH, Colt JS, Davis S, Cerhan JR, et al. 2005. Persistent organochlorine chemicals in plasma and risk of non-Hodgkin's lymphoma. *Cancer Res* 65:11214-11226.

Engel LS, Laden F, Andersen A, Strickland PT, Blair A, Needham LL, et al. 2007a. Polychlorinated biphenyl levels in peripheral blood and non-Hodgkin's lymphoma: a report from three cohorts. *Cancer Res* 67:5545-5552.

Fritschi L, Benke G, Hughes AM, Krickler A, Vajdic CM, Grulich A, et al. 2005. Risk of non-Hodgkin lymphoma associated with occupational exposure to solvents, metals, organic dusts and PCBs (Australia). *Cancer Causes Control* 16:599-607.

Greenland S, Salvan A, Wegman DH, Hallock MF, Smith TJ. 1994. A case-control study of cancer mortality at a transformer-assembly facility. *Int Arch Occup Environ Health* 66:49-54.

Gustavsson P, Hogstedt C. 1997. A cohort study of Swedish capacitor manufacturing workers exposed to polychlorinated biphenyls (PCBs). *Am J Ind Med* 32:234-249.

- Hardell K, Carlberg M, Hardell L, Bjornfoth H, Jogsten IE, Eriksson M, et al. 2009. Concentrations of organohalogen compounds and titers of antibodies to Epstein-Barr virus antigens and the risk for non-Hodgkin lymphoma. *Oncol Rep* 21:1567-1576.
- Hardell L, Eriksson M, Lindstrom G, Van BB, Linde A, Carlberg M, et al. 2001. Case-control study on concentrations of organohalogen compounds and titers of antibodies to Epstein-Barr virus antigens in the etiology of non-Hodgkin lymphoma. *Leuk Lymphoma* 42:619-629.
- Hardell L, Liljegren G, Lindstrom G, Van BB, Fredrikson M, Hagberg H. 1997. Polychlorinated biphenyls, chlordanes, and the etiology of non-Hodgkin's lymphoma. *Epidemiology* 8:689.
- Hardell L, van Bavel B, Lindstrom G, Fredrikson M, Hagberg H, Liljegren G, et al. 1996. Higher concentrations of specific polychlorinated biphenyl congeners in adipose tissue from non-Hodgkin's lymphoma patients compared to controls without malignant disease. *Int J Oncol* 9:603-608.
- Kimbrough RD, Doemland ML, LeVois ME. 1999. Mortality in male and female capacitor workers exposed to polychlorinated biphenyls. *J Occup Environ Med* 41:161-171.
- Kimbrough RD, Doemland ML, Mandel JS. 2003. A mortality update of male and female capacitor workers exposed to polychlorinated biphenyls. *J Occup Environ Med* 45:271-282.
- Laden F, Bertrand KA, Altshul LM, Aster JC, Korrick SA, Sagiv SK. 2010. Plasma organochlorine levels and risk of non-Hodgkin lymphoma in the Nurses' Health Study. *Cancer Epidemiol Biomarkers Prev* 19:1381-1384.
- Liss GM. 1989. Mortality and cancer morbidity among transformer manufacturing workers. Toronto:Ontario Ministry of Labour Policy and Regulations Branch Health Studies Service.
- Loomis D, Browning SR, Schenck AP, Gregory E, Savitz DA. 1997. Cancer mortality among electric utility workers exposed to polychlorinated biphenyls. *Occup Environ Med* 54:720-728.
- Mallin K, McCann K, D'Aloisio A, Freels S, Piorkowski J, Dimos J, et al. 2004. Cohort mortality study of capacitor manufacturing workers, 1944-2000. *J Occup Environ Med* 46:565-576.
- Morton LM, Wang SS, Cozen W, Linet MS, Chatterjee N, Davis S, et al. 2008. Etiologic heterogeneity among non-Hodgkin lymphoma subtypes. *Blood* 112:5150-5160.
- Moysich KB, Mendola P, Schisterman EF, Freudenheim JL, Ambrosone CB, Vena JE, et al. 1999. An evaluation of proposed frameworks for grouping polychlorinated biphenyl (PCB) congener data into meaningful analytic units. *Am J Ind Med* 35:223-231.
- Nordstrom M, Hardell L, Lindstrom G, Wingfors H, Hardell K, Linde A. 2000. Concentrations of organochlorines related to titers to Epstein-Barr virus early antigen IgG as risk factors for hairy cell leukemia. *Environ Health Perspect* 108:441-445.

- Prince MM, Hein MJ, Ruder AM, Waters MA, Laber PA, Whelan EA. 2006a. Update: cohort mortality study of workers highly exposed to polychlorinated biphenyls (PCBs) during the manufacture of electrical capacitors, 1940-1998. *Environ Health* 5:13. doi: 10.1186/1476-069X-5-13.
- Prince MM, Ruder AM, Hein MJ, Waters MA, Whelan EA, Nilsen N, et al. 2006b. Mortality and exposure response among 14,458 electrical capacitor manufacturing workers exposed to polychlorinated biphenyls (PCBs). *Environ Health Perspect* 114:1508-1514.
- Quintana PJE, Delfino RF, Korrick S, Ziogas A, Kutz FW, Jones EL, et al. 2004. Adipose tissue levels of organochlorine pesticides and polychlorinated biphenyls and risk of non-Hodgkin's lymphoma. *Environ Health Perspect* 112:854-861.
- Rothman N, Cantor KP, Blair A, Bush D, Brock JW, Helzlsouer K, et al. 1997. A nested case-control study of non-Hodgkin lymphoma and serum organochlorine residues. *Lancet* 350:240-244.
- Ruder AM, Hein MJ, Nilsen N, Waters MA, Laber P, Davis-King K, et al. 2006. Mortality among workers exposed to polychlorinated biphenyls (PCBs) in an electrical capacitor manufacturing plant in Indiana: an update. *Environ Health Perspect* 114:18-23.
- Sinks T, Steele G, Smith AB, Watkins K, Shults RA. 1992. Mortality among workers exposed to polychlorinated biphenyls. *Am J Epidemiol* 136:389-398.
- Spinelli JJ, Ng CH, Weber JP, Connors JM, Gascoyne RD, Lai AS, et al. 2007. Organochlorines and risk of non-Hodgkin lymphoma. *Int J Cancer* 121:2767-2775.
- Svensson BG, Mikoczy Z, Stromberg U, Hagmar L. 1995. Mortality and cancer incidence among Swedish fishermen with a high dietary intake of persistent organochlorine compounds. *Scand J Work Environ Health* 21:106-115.
- Tironi A, Pesatori AC, Consonni D, Zocchetti C, Bertazzi PA. 1996. Mortality di lavoratrici esposte a PCB [The mortality of female workers exposed to PCBs] (Italian). *Epidemiol Prev* 20:200-202.
- Viel JF, Floret N, Deconinck E, Focant JF, De Pauw E, Cahn JY. 2011. Increased risk of non-Hodgkin lymphoma and serum organochlorine concentrations among neighbors of a municipal solid waste incinerator. *Environ Int* 37:449-453.
- Yassi A, Tate R, Fish D. 1994. Cancer mortality in workers employed at a transformer manufacturing plant. *Am J Ind Med* 25:425-437.
